# Supplementary material for: Functionalization of photochromic dithienylmaleimides
Source: Royal Society of Chemistry journal article supplement (doi:10.1039/c5ra00015g), 2015-01-01

## Functionalization of Photochromic Dithienylmaleimides

D. Wutz, C. Falencyk, N. Kuzmanovic and B. König\*

### Supporting Information

|                                                                            |     |
|----------------------------------------------------------------------------|-----|
| Non-hydrolytic methyl ester deprotection of <b>12</b>                      | S-2 |
| Synthesis of compounds <b>11S</b> , <b>12S</b> , <b>13S</b> and <b>21S</b> | S-2 |
| <sup>1</sup> H- and <sup>13</sup> C-NMR spectra of all prepared compounds  | S-6 |

## Non-hydrolytic methyl ester deprotection of **12**

**Table S1.** Non-hydrolytic methyl ester deprotection of **12**.

| Entry | LiI [eq] | Solvent | T [°C] | Isolated yield <sup>[a]</sup> |
|-------|----------|---------|--------|-------------------------------|
| 1     | 3.0      | EtOAc   | r.t.   | --                            |
| 2     | 3.0      | EtOAc   | reflux | --                            |
| 3     | 30       | EtOAc   | reflux | 26%                           |
| 4     | 3.0      | acetone | reflux | --                            |
| 5     | 30       | acetone | reflux | 35%                           |
| 6     | 30       | MeCN    | reflux | --                            |
| 7     | 30       | DMSO    | 100 °C | --                            |

<sup>[a]</sup> If conversion was too low the product **13b** was not isolated.

## Synthesis of compounds **11S**, **12S**, **13S** and **21S**

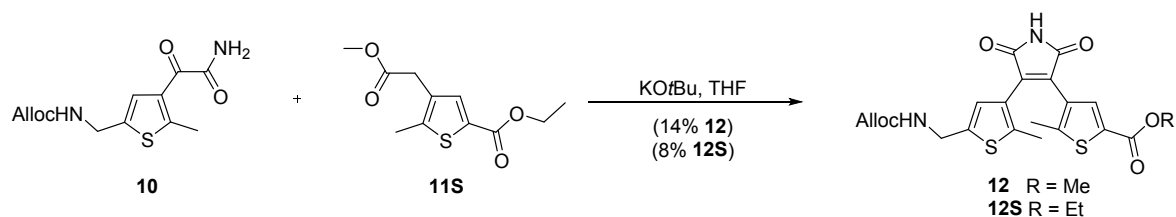

**Scheme S1.** Perkin condensation of **10** and **11S** yielding dithienylmaleimide **12** and **12S**.

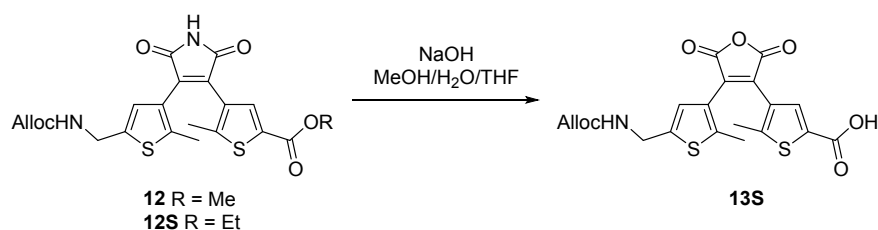

**Scheme S2.** Hydrolytic ester cleavage yielding maleic anhydride **13S**.

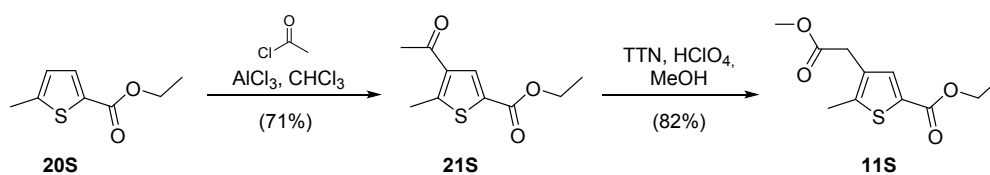

**Scheme S3.** Synthesis of ethyl ester **11S**.

**Ethyl 4-(2-methoxy-2-oxoethyl)-5-methylthiophene-2-carboxylate (11S):** Thallium trinitrate (2.20 g, 4.94 mmol) and 70% HClO<sub>4</sub> (2 mL) were added to a suspension of **21S** (875 mg, 4.12 mmol) in MeOH (10 mL) at room temperature. After stirring for 24 h the mixture was concentrated under reduced pressure and diluted with water (10 mL). The aqueous phase was extracted with chloroform (3 x 15 mL) and the combined organic layers were dried over MgSO<sub>4</sub>. The solvent was evaporated and purification of the crude product by automated flash column chromatography (PE/EtOAc, 3% - 15% EtOAc) yielded compound **11S** (816 mg, 82%) as yellowish oil. *R*<sub>f</sub>: 0.23 (PE/EtOAc: 9/1); IR (neat)  $\nu_{\max}$ : 3081, 2987, 2922, 1730, 1705, 1460, 1254, 1201, 1172, 1061; <sup>1</sup>H-NMR (400 MHz, CDCl<sub>3</sub>):  $\delta$  = 1.35 (t, *J* = 7.1 Hz, 3H, O-CH<sub>2</sub>-CH<sub>3</sub>), 2.42 (s, 3H, thiophene-CH<sub>3</sub>), 3.54 (s, 2H, C-CH<sub>2</sub>-CO), 3.70 (s, 3H, CO-O-CH<sub>3</sub>), 4.31 (q, *J* = 7.1 Hz, 2H, O-CH<sub>2</sub>-CH<sub>3</sub>), 7.60 (s, 1H, thiophene-*H*); <sup>13</sup>C-NMR (75 MHz, CDCl<sub>3</sub>):  $\delta$  = 13.8 (+), 14.4 (+), 33.8 (-), 52.2 (+), 61.0 (-), 129.6 (q), 130.6 (q), 135.4 (+), 143.8 (q), 162.2 (q), 171.0 (q); HR-MS (ESI): calcd. for C<sub>11</sub>H<sub>14</sub>NaO<sub>4</sub>S (M+Na)<sup>+</sup> 265.0505; found 265.0502.

**Methyl/Ethyl 4-(4-(5-(((allyloxy)carbonyl)amino)methyl)-2-methyl-thiophen-3-yl)-2,5-dioxo-2,5-dihydro-1H-pyrrol-3-yl)-5-methylthiophene-2-carboxylate (12/12S):** KO<sup>t</sup>Bu (1 M in THF, 1.34 mL, 1.34 mmol) was added to a solution of **10** (316 mg, 1.12 mmol) in anhydrous THF (6 mL) at 0 °C under nitrogen atmosphere. After stirring for 90 min at 0 °C, diester **11S** (326 mg, 1.34 mmol) was added and stirred for 15 h at room temperature. Then the reaction was heated to 60 °C for 1 h, quenched with 1 M HCl solution (4 mL) and diluted with EtOAc (10 mL). The organic phase was washed with water (3 x 5 mL), brine (5 mL) and dried over MgSO<sub>4</sub>. The solvent was removed under reduced pressure and purification of the crude product by automated reversed phase flash column chromatography (H<sub>2</sub>O/EtOH, 20% - 45% EtOH) yielded **12S** (40 mg, 8%) as orange foam, **12** (74 mg, 14%) as yellow foam and a mixed fraction of both (65 mg). Analytical data of **12S**: *R*<sub>f</sub>: 0.25 (PE/EtOAc: 2/1); IR (neat)  $\nu_{\max}$ : 3288, 3071, 2980, 1710, 1541, 1458, 1252, 995, 916, 760; UV/Vis (50  $\mu$ M in MeOH): open isomer:  $\lambda_{\max}$  = 250 nm; closed isomer:  $\lambda_{\max}$  = 232 nm, 378 nm, 554 nm; <sup>1</sup>H-NMR (400 MHz, CDCl<sub>3</sub>):  $\delta$  = 1.36 (t, *J* = 7.1 Hz, 3H, O-CH<sub>2</sub>-CH<sub>3</sub>), 1.91 (s, 3H, thiophene-CH<sub>3</sub>), 1.97 (s, 3H, thiophene-CH<sub>3</sub>), 4.33 (q, *J* = 7.1 Hz, 2H, O-CH<sub>2</sub>-CH<sub>3</sub>), 4.45 (d, *J* = 5.9 Hz, 2H, C-CH<sub>2</sub>-NH), 4.60 (d, *J* = 4.8 Hz, 2H, O-CH<sub>2</sub>-CH), 5.14 -5.26 (m, 2H, CH<sub>2</sub>=CH-CH<sub>2</sub> and CH<sub>2</sub>-NH-CO), 5.31 (dd, *J* = 17.2, 1.1 Hz, 1H, CH<sub>2</sub>=CH-CH<sub>2</sub>), 5.92 (ddt, *J* = 16.3, 10.8, 5.6 Hz, 1H, CH<sub>2</sub>=CH-CH<sub>2</sub>), 6.90 (s, 1H, thiophene-*H*), 7.75 (s, 1H, thiophene-*H*), 7.97 (bs, 1H, CO-NH-CO); <sup>13</sup>C-NMR (101 MHz, CDCl<sub>3</sub>):  $\delta$  = 14.3 (+), 15.0 (+), 15.3 (+), 39.9 (-),

61.4 (-), 65.9 (-), 117.9 (-), 125.8 (q), 126.7 (+), 127.4 (q), 131.4 (q), 132.7 (+), 132.8 (q), 134.7 (+), 139.4 (q), 142.1 (q), 148.4 (q), 156.0 (q), 161.7 (q), 170.0 (q), 170.1 (q); HR-MS (ESI): calcd. for C<sub>22</sub>H<sub>23</sub>N<sub>2</sub>O<sub>6</sub>S<sub>2</sub> (M+H)<sup>+</sup> 475.0993; found 475.0992.

**4-(4-(5-(((Allyloxy)carbonyl)amino)methyl)-2-methylthiophen-3-yl)-2,5-dioxo-2,5-dihydrofuran-3-yl)-5-methylthiophene-2-carboxylic acid (13S):** A mixture of **12** and **12S** (62 mg) in 10 mL of H<sub>2</sub>O/MeOH/THF (2:5:3, v/v/v) was stirred for 20 h with NaOH (78 mg, 1.95 mmol) at room temperature. After addition of water (10 mL) the reaction mixture was washed with EtOAc (2 x 10 mL) and then acidified with conc. HCl to pH 1. The aqueous phase was extracted with EtOAc (3 x 10 mL) and the combined organic phases were dried over MgSO<sub>4</sub>. Evaporation of the solvent and purification of the crude product by automated reversed phase flash column chromatography (H<sub>2</sub>O/MeCN, 20% - 55% MeCN) yielded **13S** (29 mg)<sup>A</sup> as green solid. R<sub>f</sub>: 0.02 (PE/EtOAc: 1/1); m.p.: 84 °C; IR (neat) ν<sub>max</sub>: 3327, 3164, 3020, 2925, 1764, 1702, 1541, 1458, 1254, 931, 750; UV/Vis (50 μM in MeOH): open isomer: λ<sub>max</sub> = 246 nm; closed isomer: λ<sub>max</sub> = 384 nm, 568 nm; <sup>1</sup>H-NMR (400 MHz, DMSO-*d*<sub>6</sub>): δ = 1.90 (s, 3H, thiophene-CH<sub>3</sub>), 1.96 (s, 3H, thiophene-CH<sub>3</sub>), 4.28 (d, *J* = 6.1 Hz, 2H, thiophene-CH<sub>2</sub>NH), 4.49 (d, *J* = 5.3 Hz, 2H, CH<sub>2</sub>=CHCH<sub>2</sub>O), 5.17 (dd, *J* = 10.5, 1.4 Hz, 1H, CH<sub>2</sub>=CHCH<sub>2</sub>), 5.27 (dd, *J* = 17.2, 1.5 Hz, 1H, CH<sub>2</sub>=CHCH<sub>2</sub>), 5.90 (ddt, *J* = 17.2, 10.6, 5.3 Hz, 1H, CH<sub>2</sub>=CHCH<sub>2</sub>), 6.86 (s, 1H, thiophene-*H*), 7.65 (s, 1H, thiophene-*H*), 7.92 (t, *J* = 6.0 Hz, 1H, CH<sub>2</sub>NHCO), 13.30 (bs, 1H, COOH); <sup>13</sup>C-NMR (75 MHz, DMSO-*d*<sub>6</sub>): δ = 14.1 (+), 14.5 (+), 38.8 (-), 64.4 (-), 116.9 (-), 124.9 (q), 125.5 (+), 126.8 (q), 131.6 (q), 133.5 (+), 133.9 (q), 134.1 (+), 135.6 (q), 140.8 (q), 141.4 (q), 148.6 (q), 155.9 (q), 162.2 (q), 164.9 (q), 164.9 (q); HR-MS (ESI): calcd. for C<sub>20</sub>H<sub>18</sub>NO<sub>7</sub>S<sub>2</sub> (M+H)<sup>+</sup> 448.0519; found 448.0516.

**Ethyl 4-acetyl-5-methylthiophene-2-carboxylate (21S):** A solution of acetyl chloride (128 μL, 1.80 mmol) in anhydrous chloroform (2 mL) was added to AlCl<sub>3</sub> (480 mg, 3.60 mmol) at room temperature under nitrogen atmosphere. After stirring for 10 min a solution of **20S** (204 mg, 1.20 mmol) in anhydrous chloroform (2 mL) was dropped to the suspension. The mixture was heated to 60 °C for 9 h, then the reaction was quenched with ice/water and the aqueous phase was extracted with chloroform (2 x 30 mL). The combined organic phases were washed with saturated aqueous solution of NaHCO<sub>3</sub> (50 mL) and brine

---

<sup>A</sup> Yield could not be determined because the ratio of **12** to **12S** in the mixture was not calculated.

(50 mL). The organic phase was dried over  $\text{MgSO}_4$  and the solvent was evaporated. The crude product was purified by automated flash column chromatography (PE/EtOAc, 8% - 30% EtOAc) and **21S** (180 mg, 71%) was obtained as colorless solid.  $R_f$ : 0.15 (PE/EtOAc: 9/1); m.p.: 103 °C; IR (neat)  $\nu_{\text{max}}$ : 3008, 2985, 2944, 1713, 1670, 1540, 1452, 1250, 1236, 1082, 1021, 747;  $^1\text{H-NMR}$  (400 MHz,  $\text{CDCl}_3$ ):  $\delta$  = 1.37 (t,  $J$  = 7.1 Hz, 3H, O- $\text{CH}_2$ - $\text{CH}_3$ ), 2.52 (s, 3H, thiophene- $\text{CH}_3$ ), 2.75 (s, 3H, acetyl- $\text{CH}_3$ ), 4.34 (q,  $J$  = 7.1 Hz, 2H, O- $\text{CH}_2$ - $\text{CH}_3$ ), 8.02 (s, 1H, thiophene- $H$ );  $^{13}\text{C-NMR}$  (101 MHz,  $\text{CDCl}_3$ ):  $\delta$  = 14.3 (+), 16.8 (+), 29.6 (+), 61.4 (-), 129.0 (q), 134.7 (+), 136.3 (q), 155.6 (q), 161.6 (q), 193.7 (q); HR-MS (ESI): calcd. for  $\text{C}_{10}\text{H}_{13}\text{O}_3\text{S}$  ( $\text{M}+\text{H}$ ) $^+$  213.0580; found 213.0581.

## <sup>1</sup>H- and <sup>13</sup>C-NMR spectra of all prepared compounds

<sup>1</sup>H-NMR (300 MHz, DMSO-*d*<sub>6</sub>) for compound **4**:

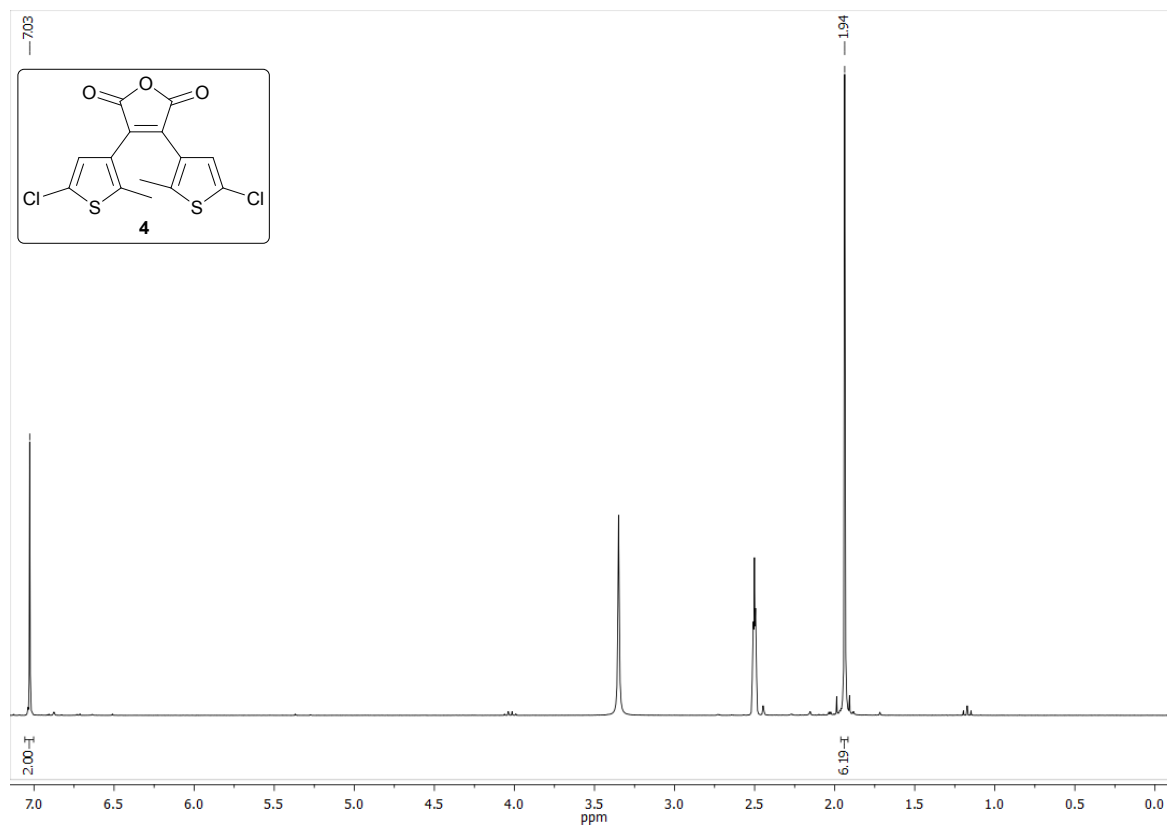

<sup>13</sup>C-NMR (75 MHz, DMSO-*d*<sub>6</sub>) for compound **4**:

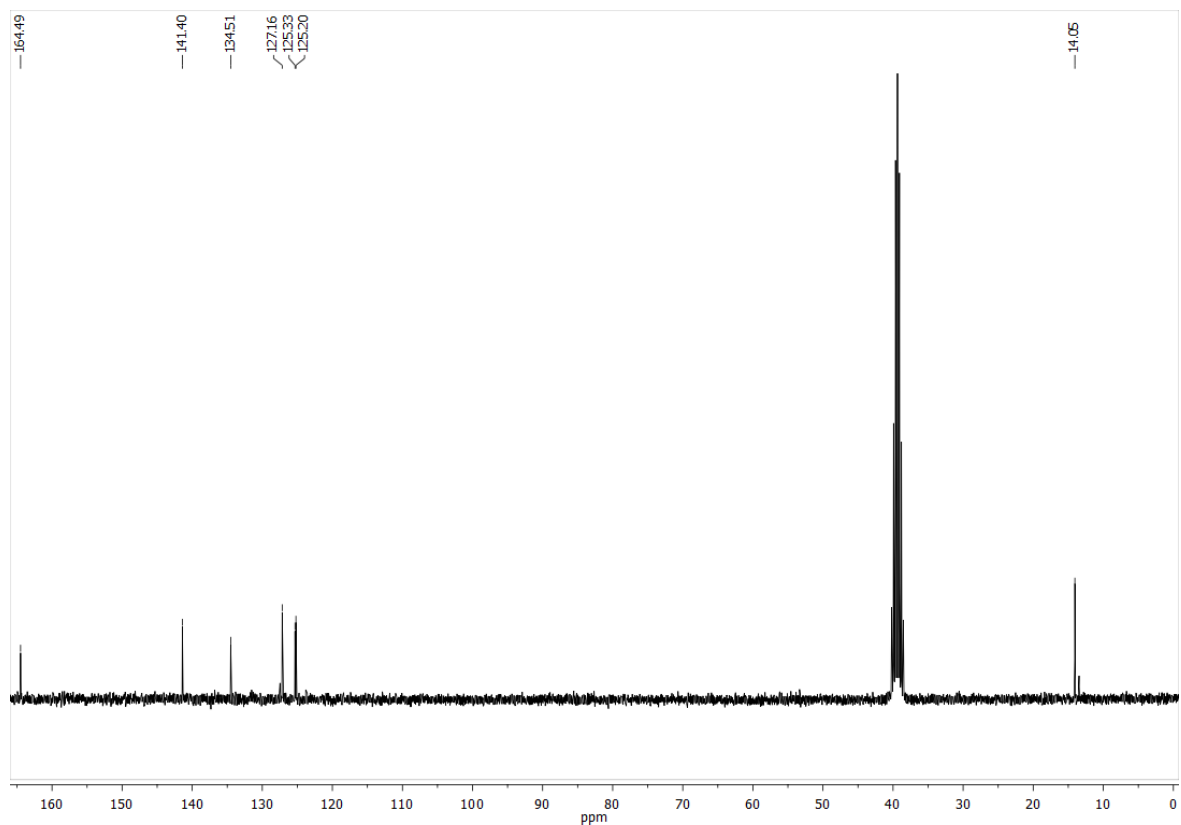

$^1\text{H-NMR}$  (300 MHz,  $\text{DMSO-}d_6$ ) for compound **6**:

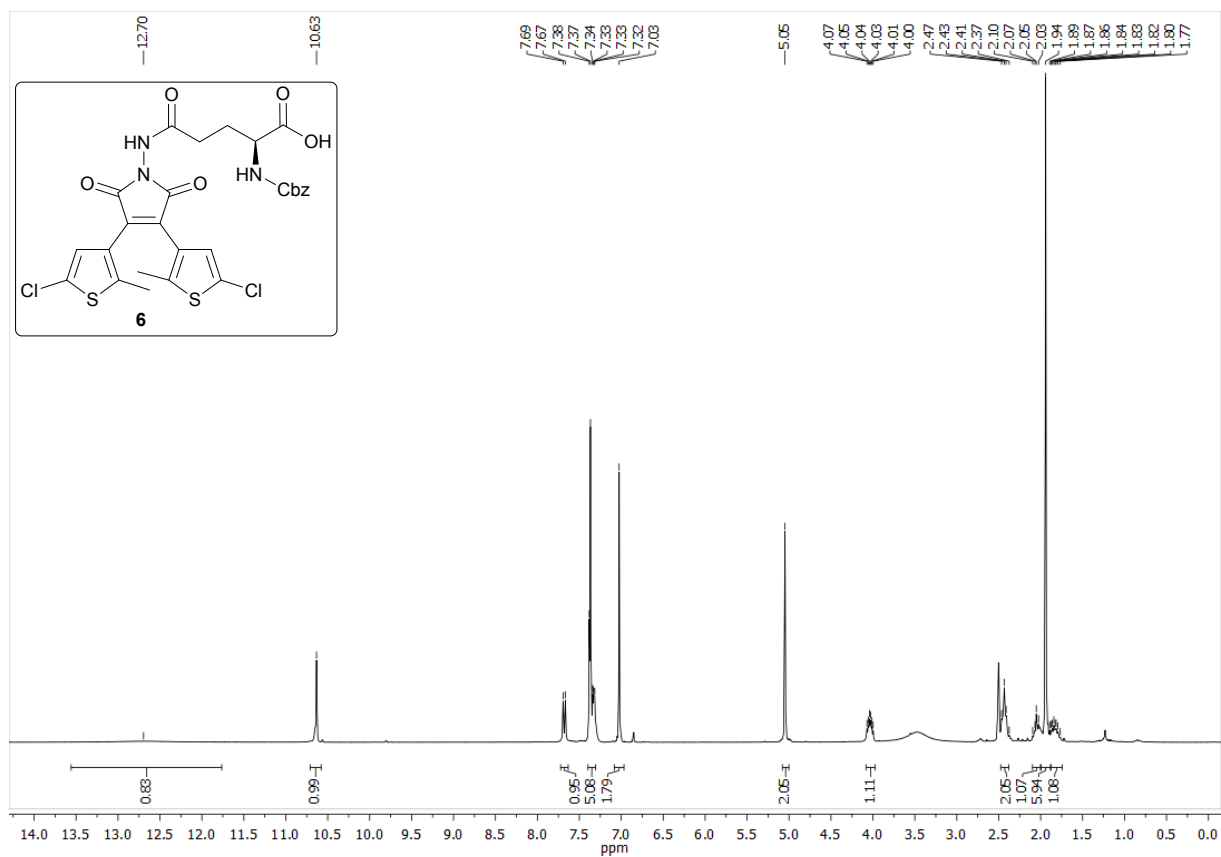

$^{13}\text{C-NMR}$  (75 MHz,  $\text{DMSO-}d_6$ ) for compound **6**:





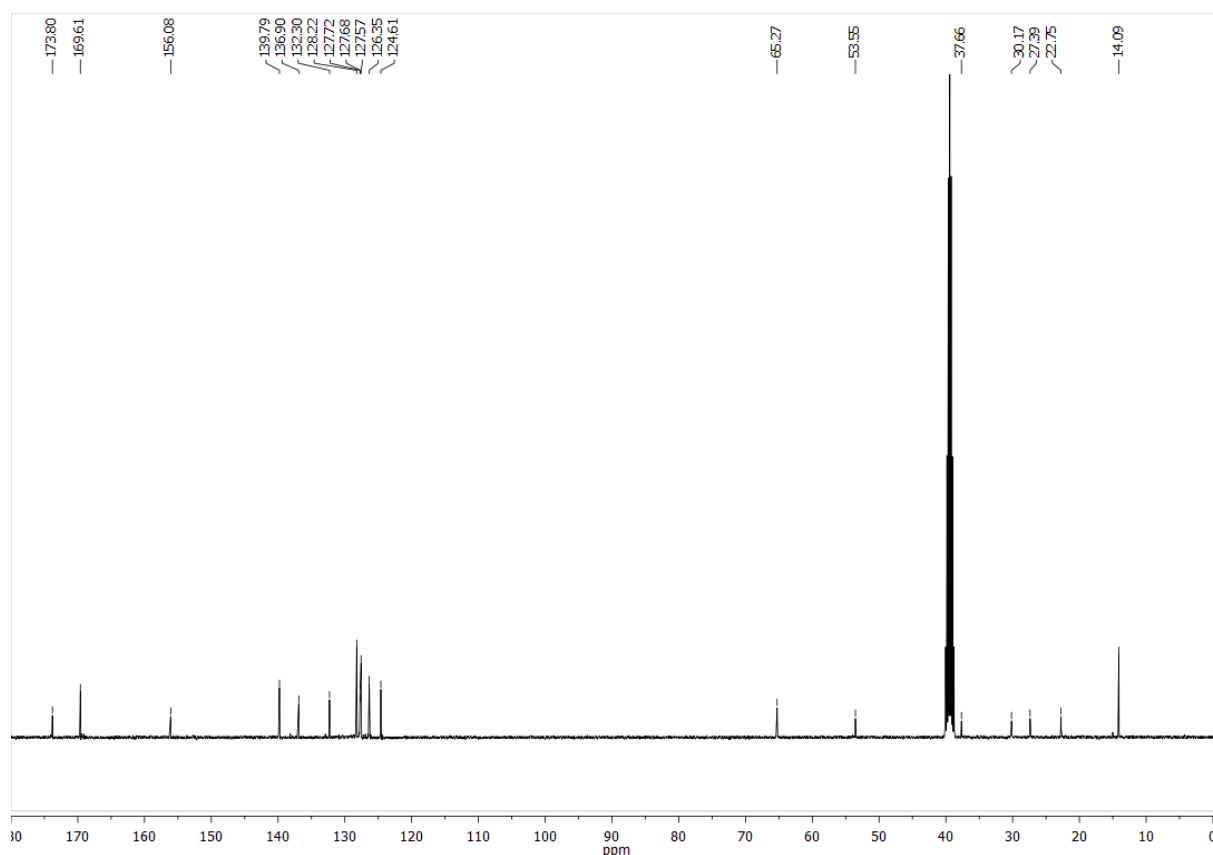

$^{13}\text{C}$ -NMR (101 MHz,  $\text{DMSO-}d_6$ ) for compound **8**:

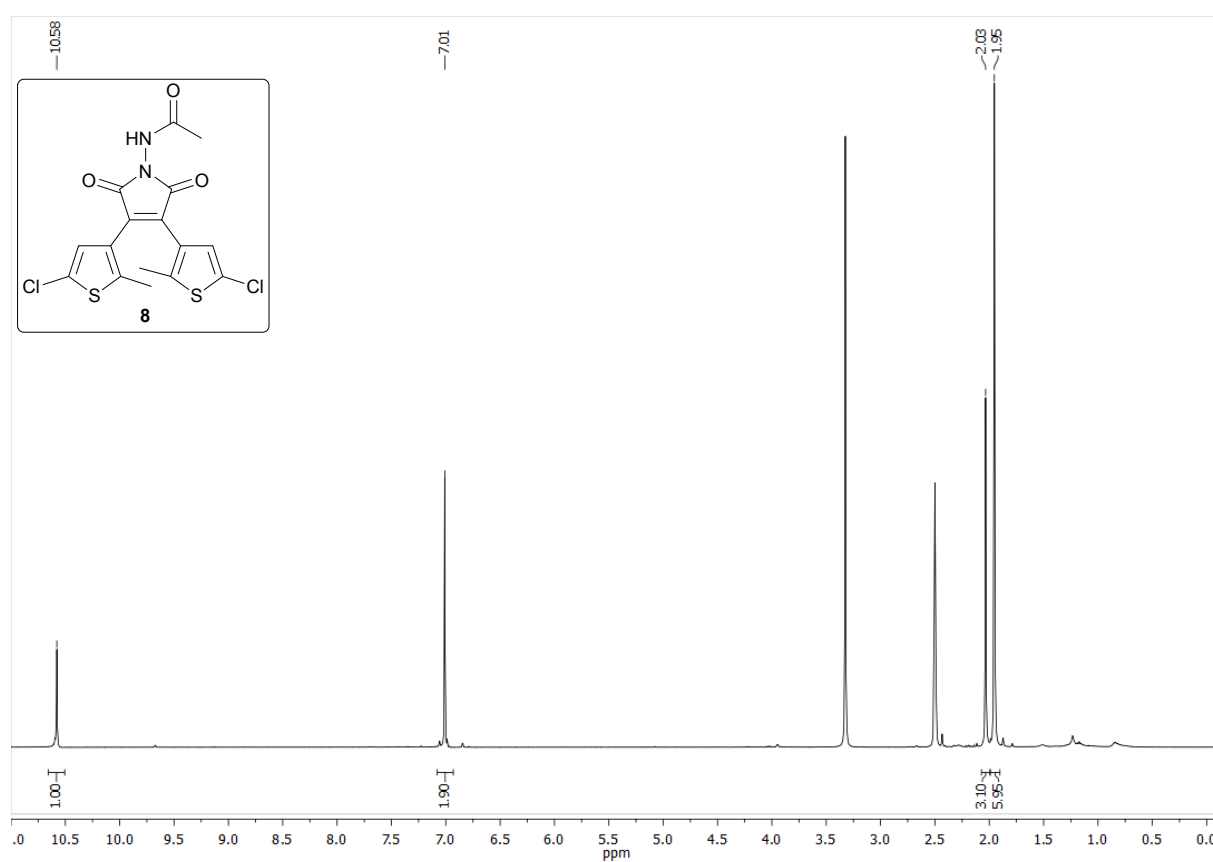

$^1\text{H}$ -NMR (400 MHz,  $\text{DMSO-}d_6$ ) for compound **8**:

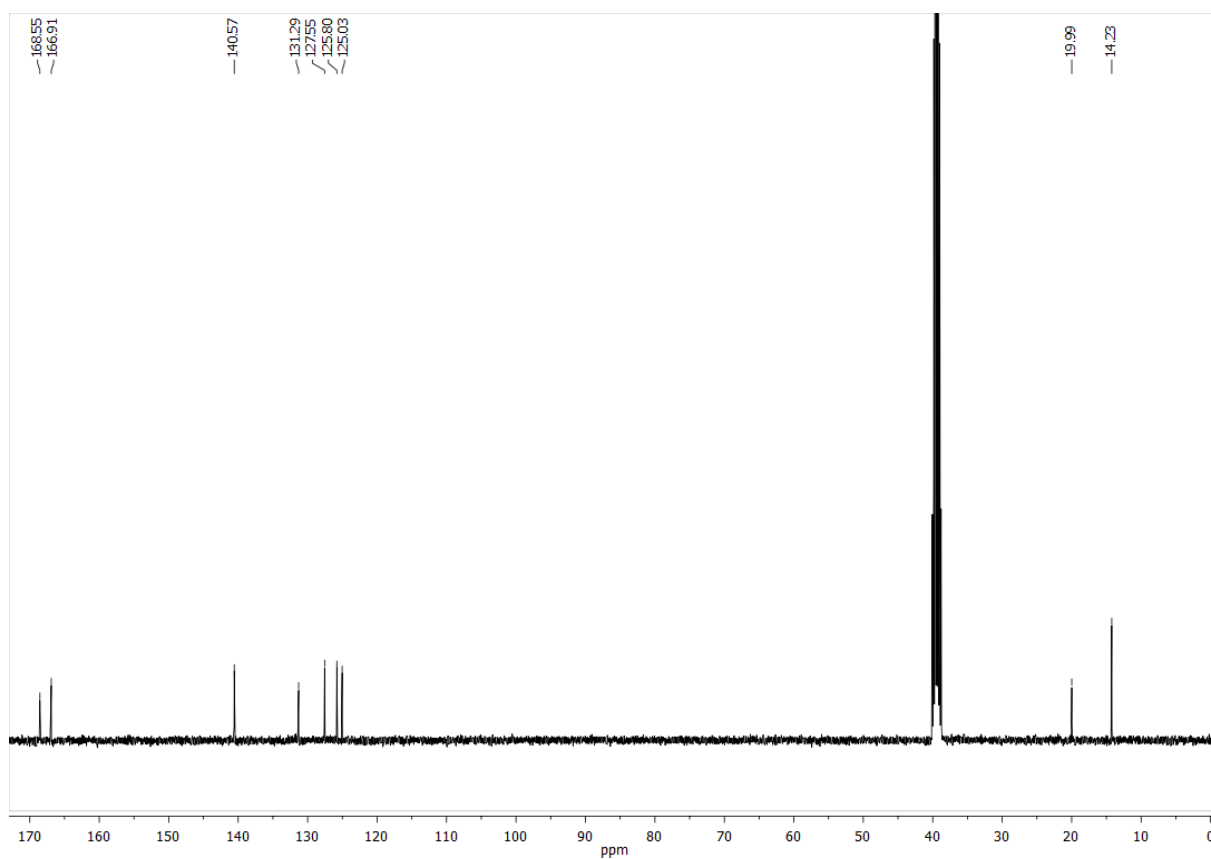

$^{13}\text{C}$ -NMR (75 MHz,  $\text{CDCl}_3$ ) for compound **9**:

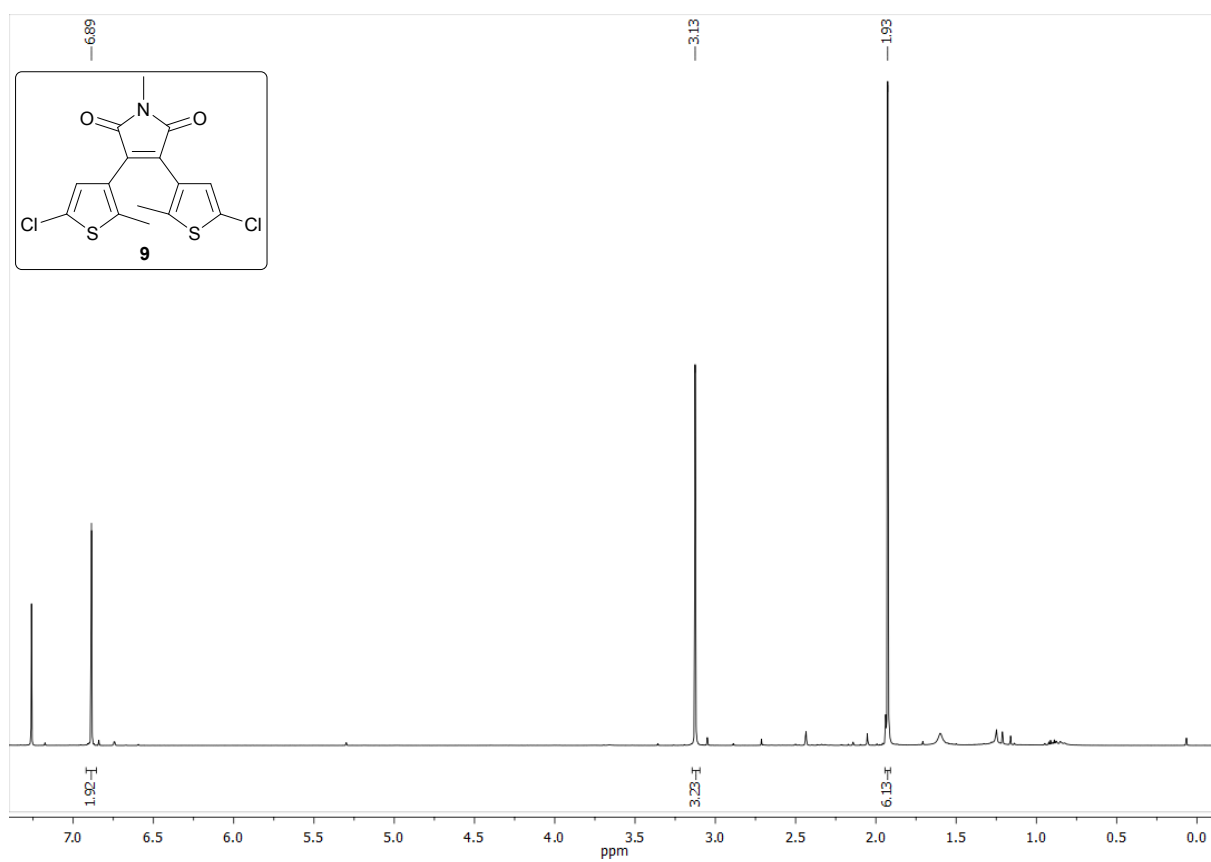

$^1\text{H}$ -NMR (300 MHz,  $\text{CDCl}_3$ ) for compound **9**:

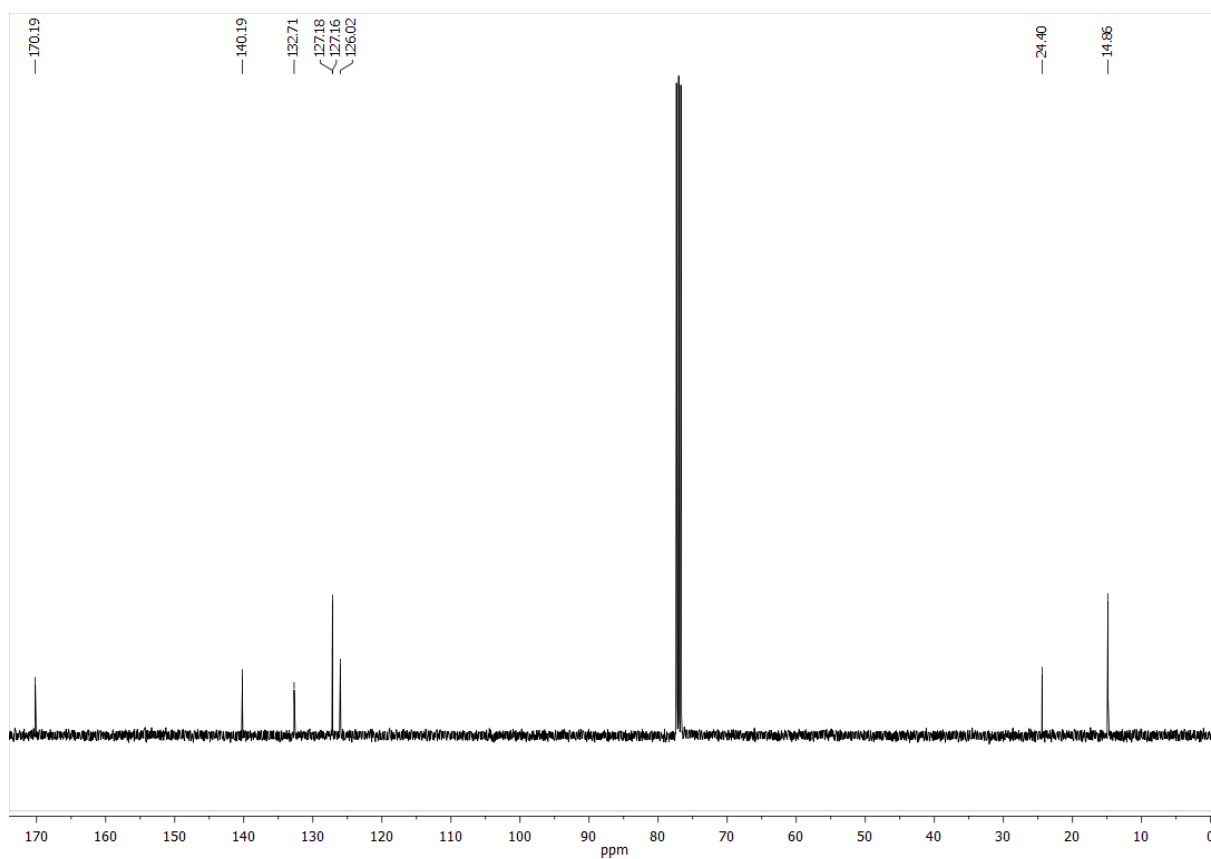

$^{13}\text{C}$ -NMR (101 MHz,  $\text{CDCl}_3$ ) for compound **10**:

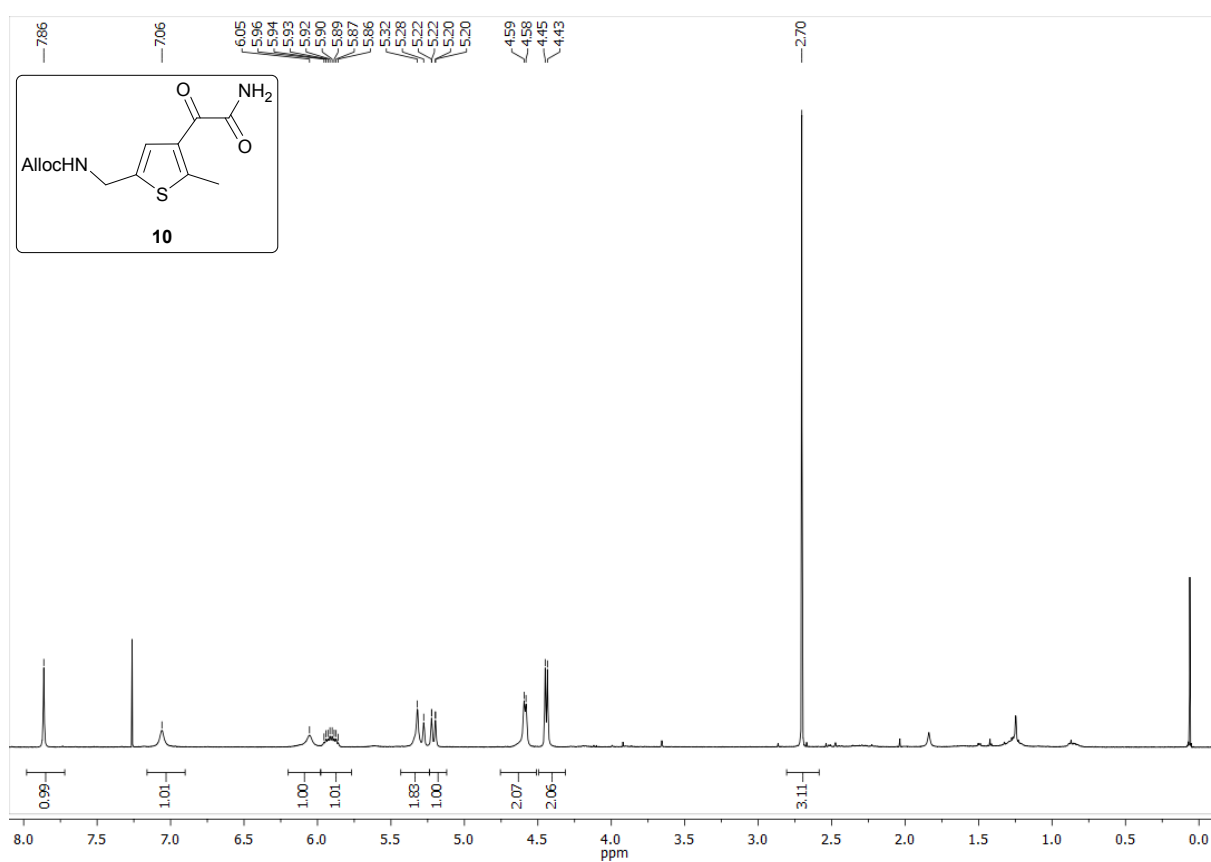

$^1\text{H}$ -NMR (400 MHz,  $\text{CDCl}_3$ ) for compound **10**:

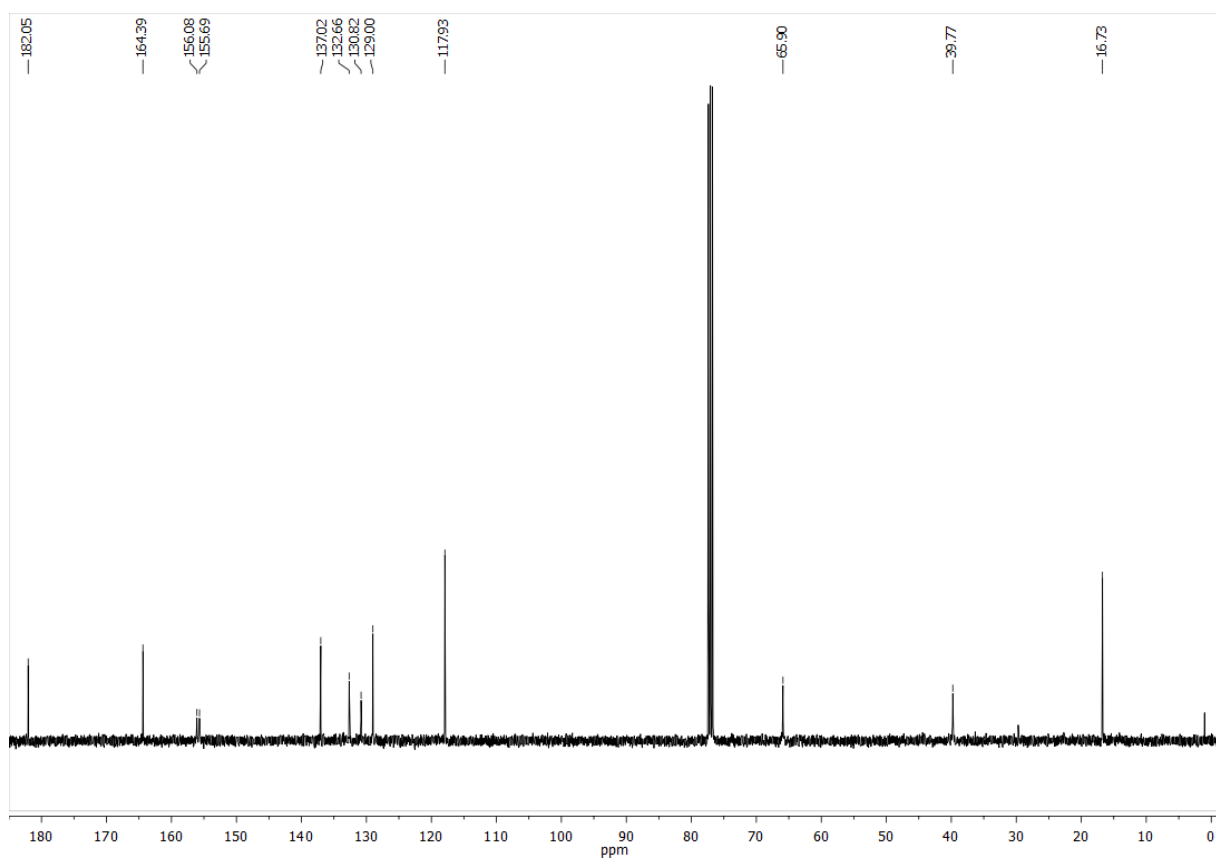

$^{13}\text{C}$ -NMR (101 MHz,  $\text{CDCl}_3$ ) for compound **11**:

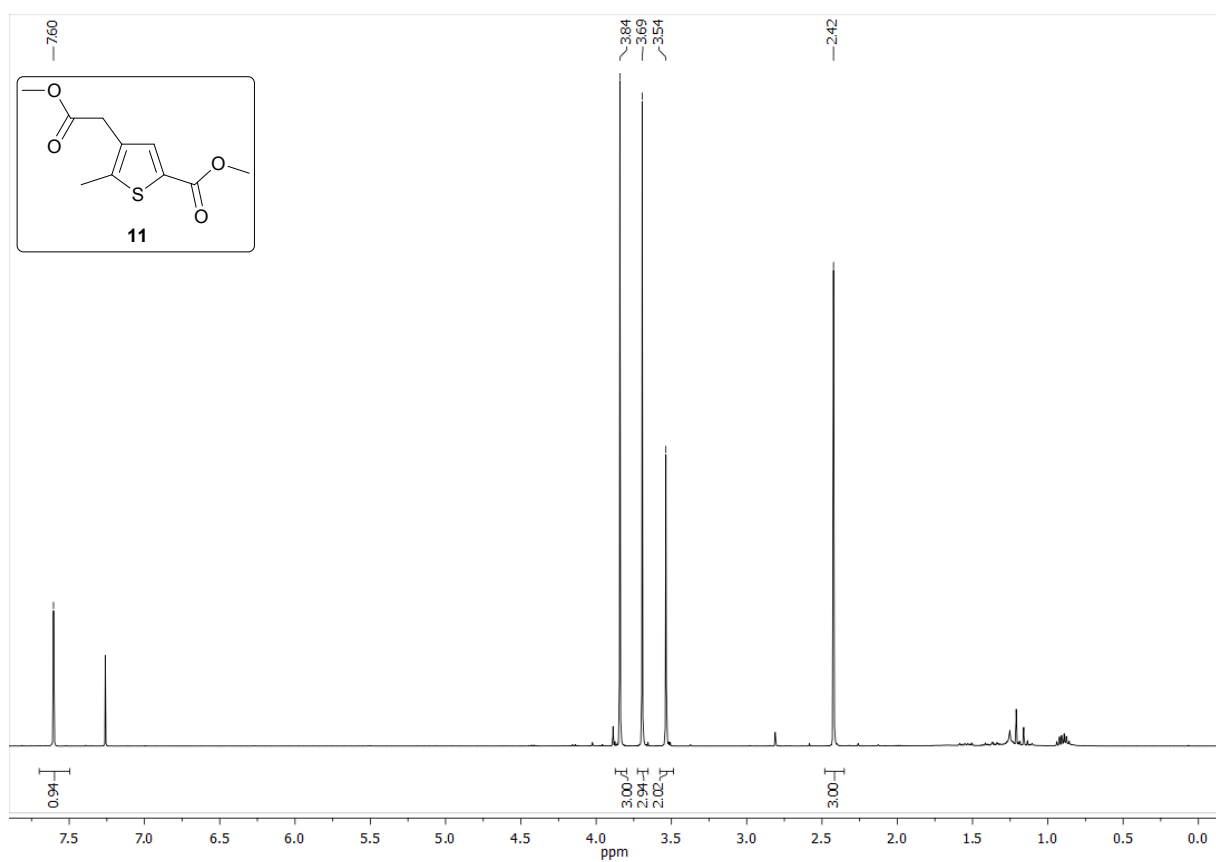

$^1\text{H}$ -NMR (400 MHz,  $\text{CDCl}_3$ ) for compound **11**:

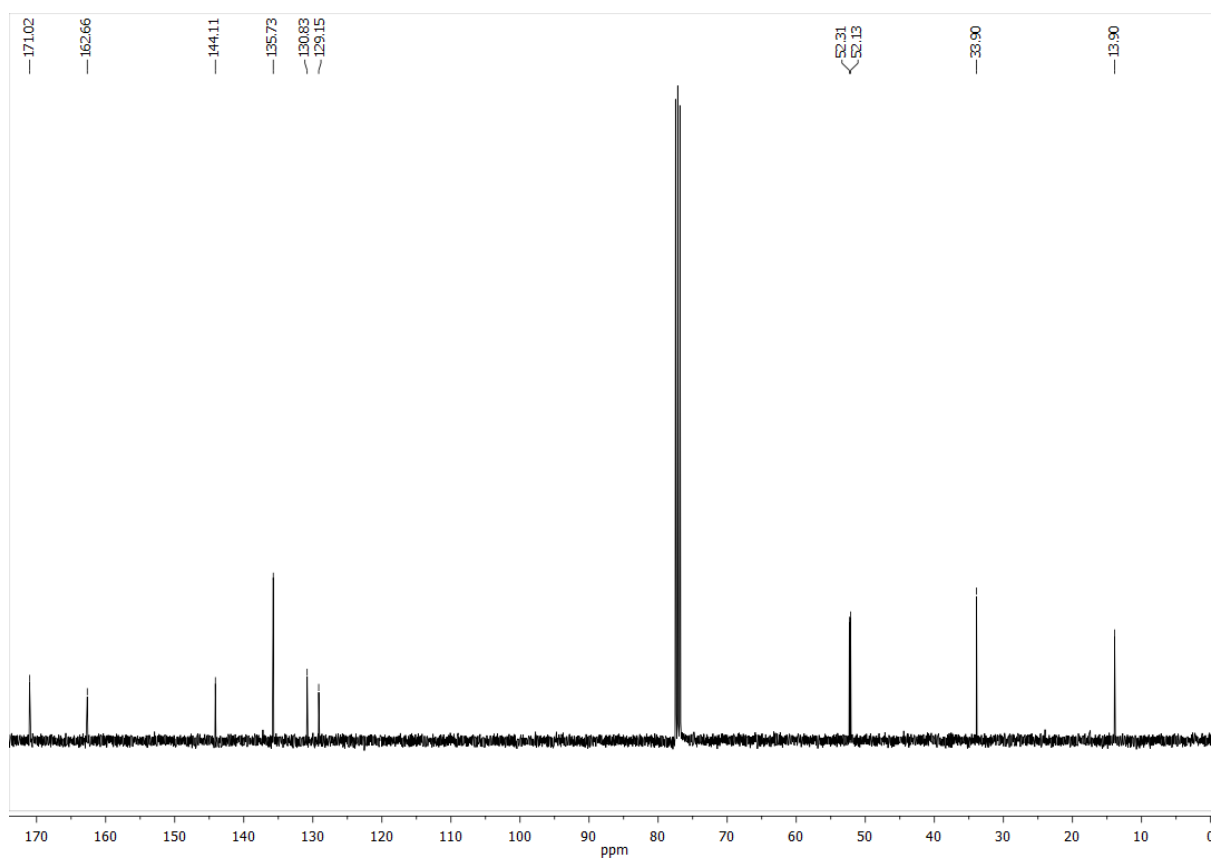

$^1\text{H-NMR}$  (400 MHz,  $\text{CDCl}_3$ ) for compound **11S**:

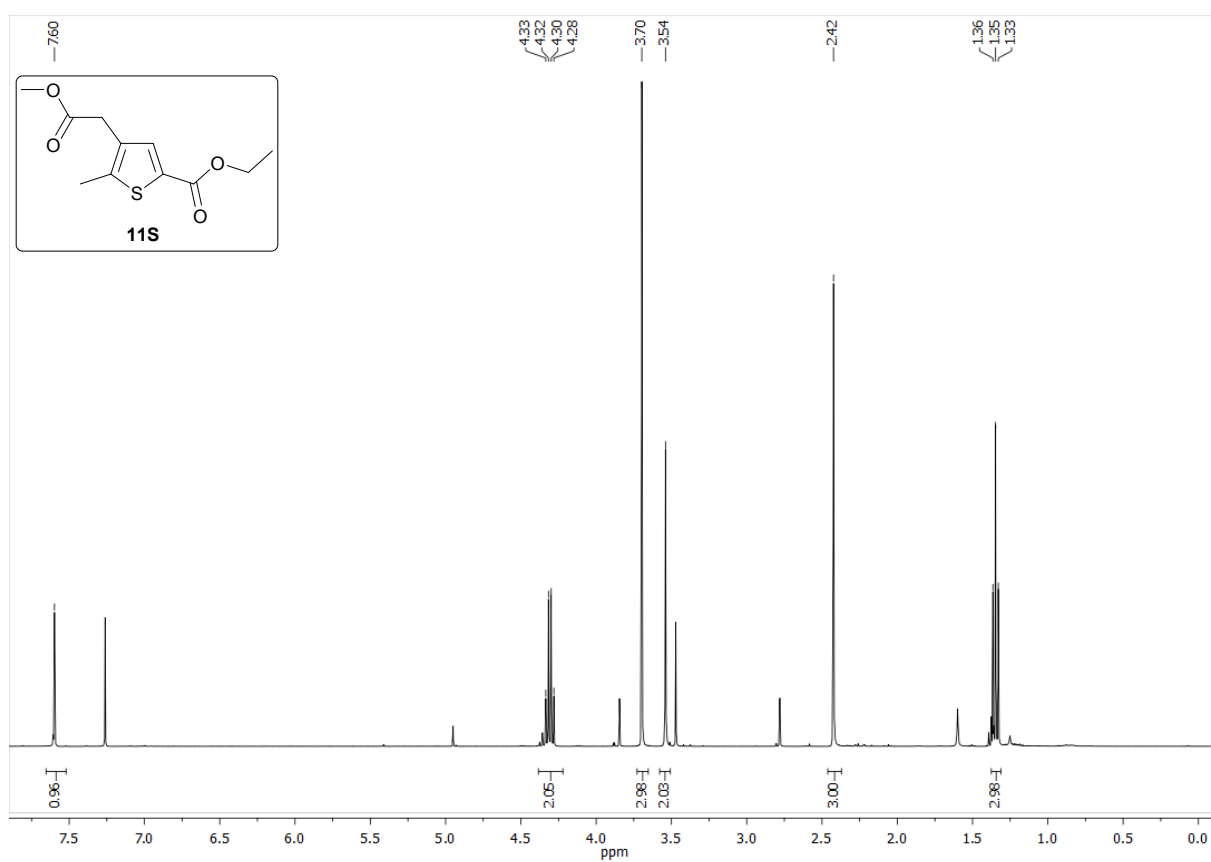

$^{13}\text{C-NMR}$  (101 MHz,  $\text{CDCl}_3$ ) for compound **11S**:

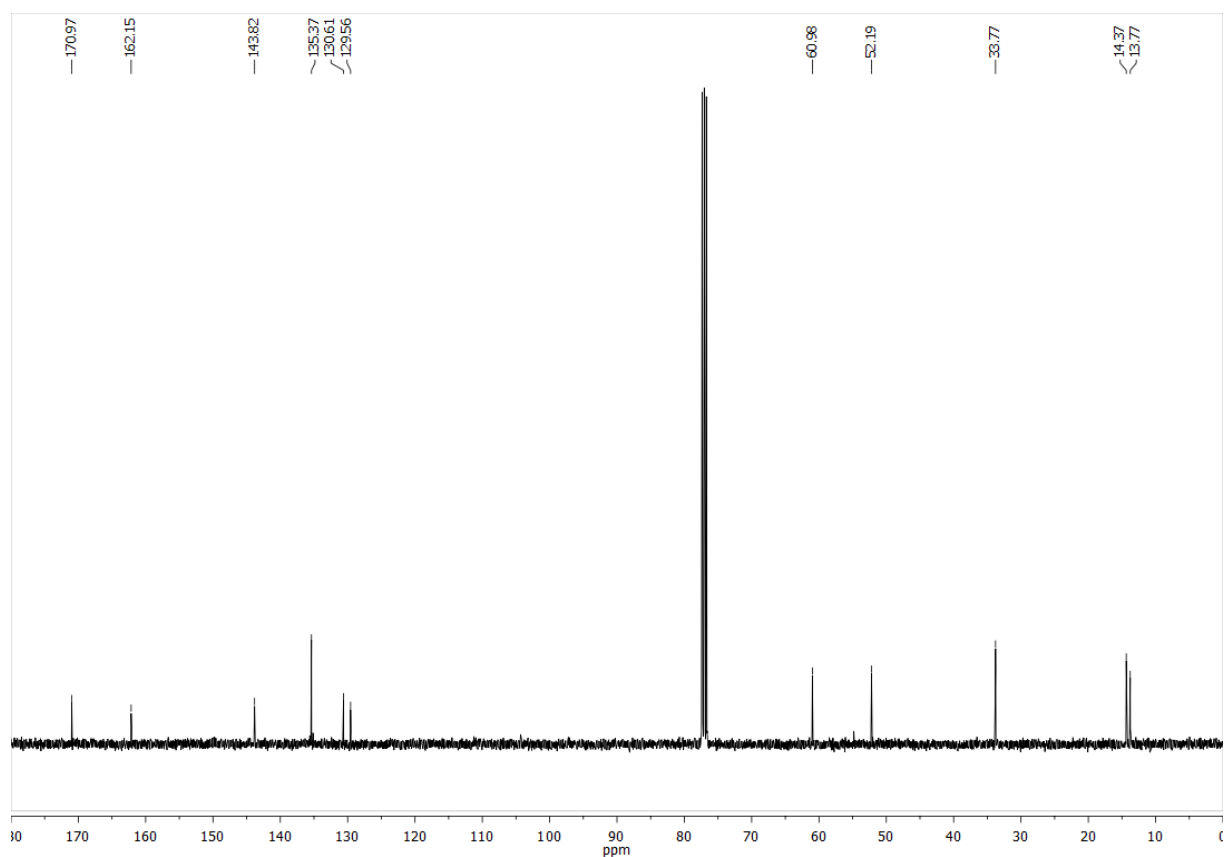

$^1\text{H-NMR}$  (400 MHz,  $\text{CDCl}_3$ ) for compound **12**:

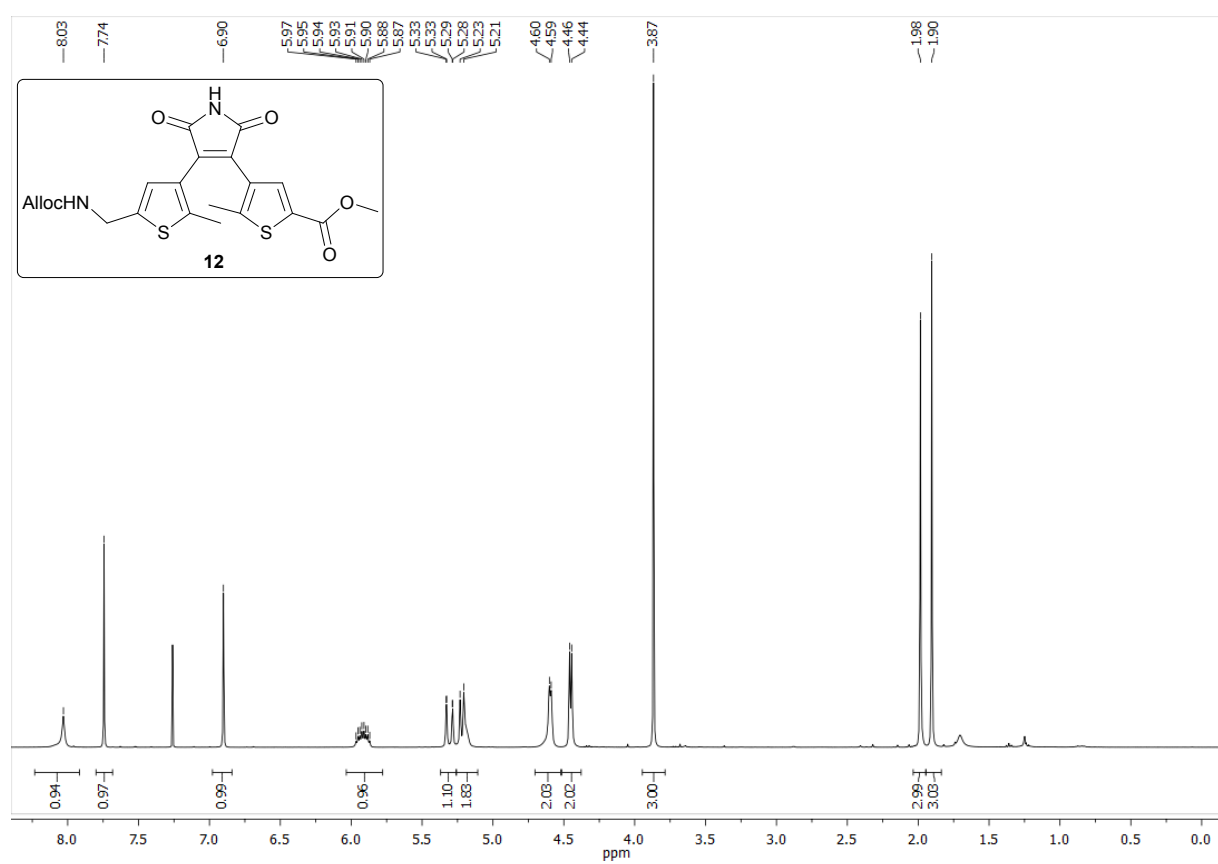

$^{13}\text{C-NMR}$  (101 MHz,  $\text{CDCl}_3$ ) for compound **12**:

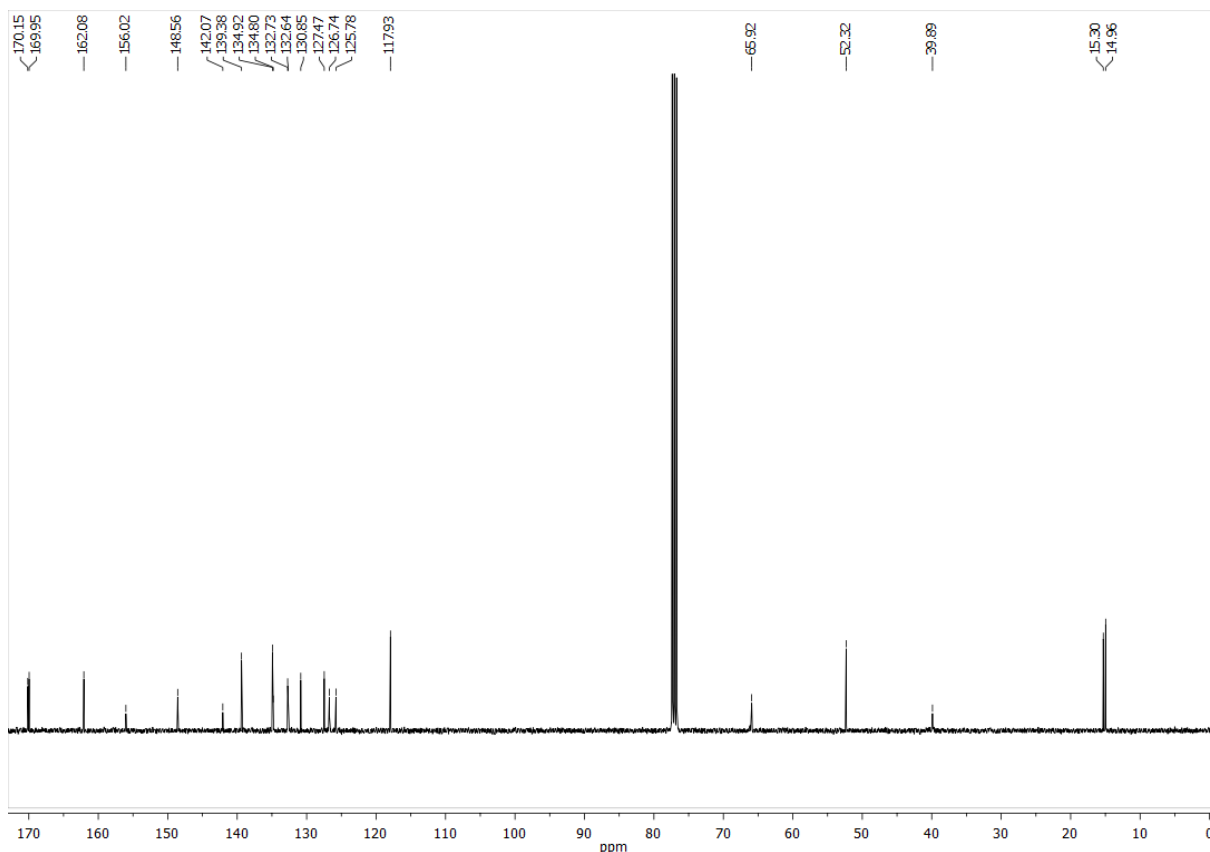

$^{13}\text{C}$ -NMR (101 MHz,  $\text{CDCl}_3$ ) for compound **12S**:

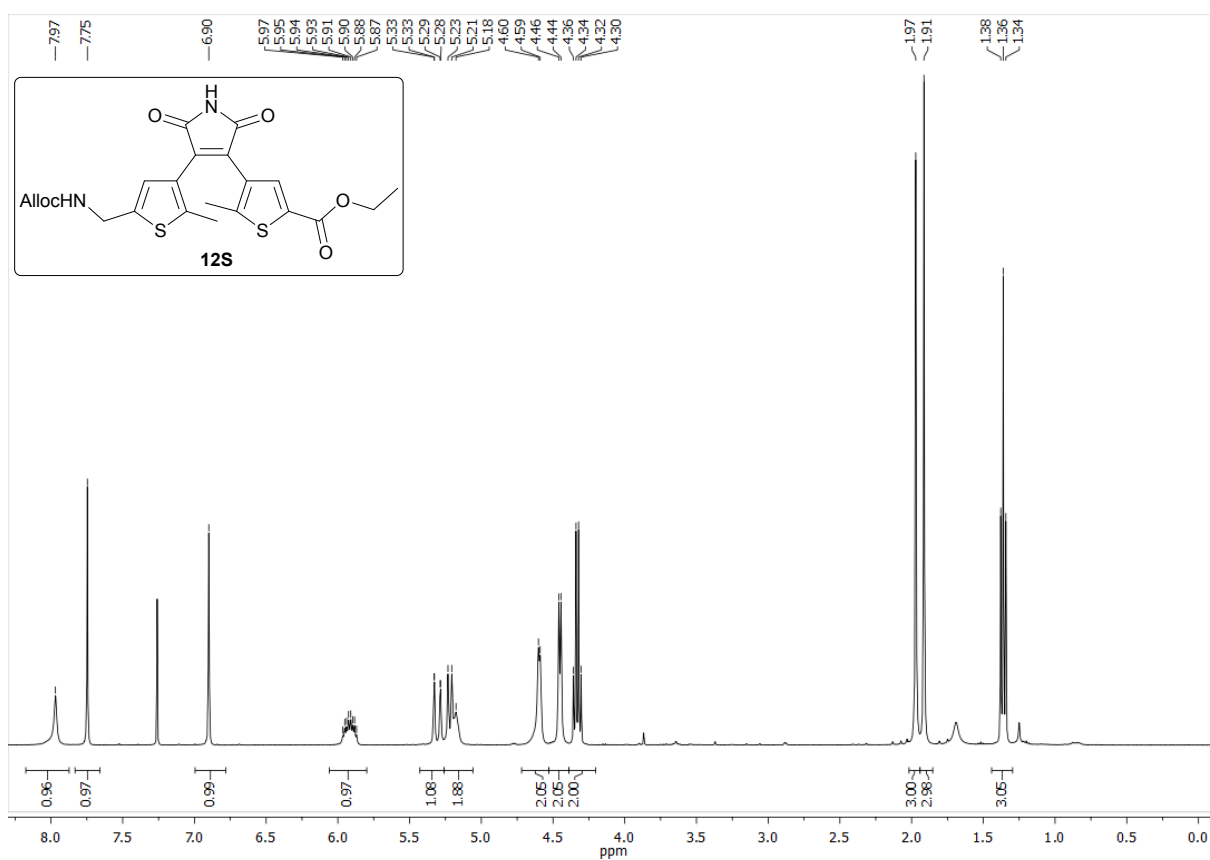

$^1\text{H}$ -NMR (400 MHz,  $\text{CDCl}_3$ ) for compound **12S**:

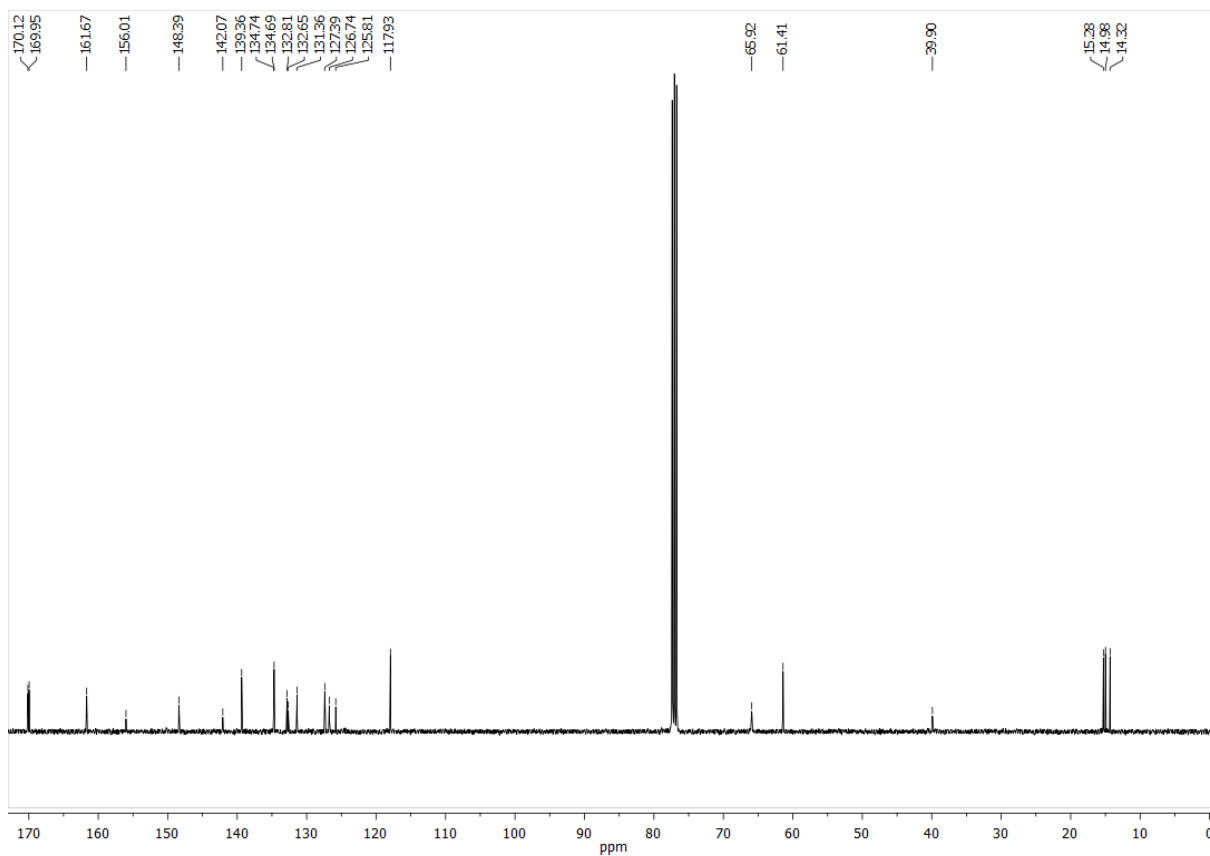

$^{13}\text{C}$ -NMR (151 MHz, MeOD) for compound **13a**:

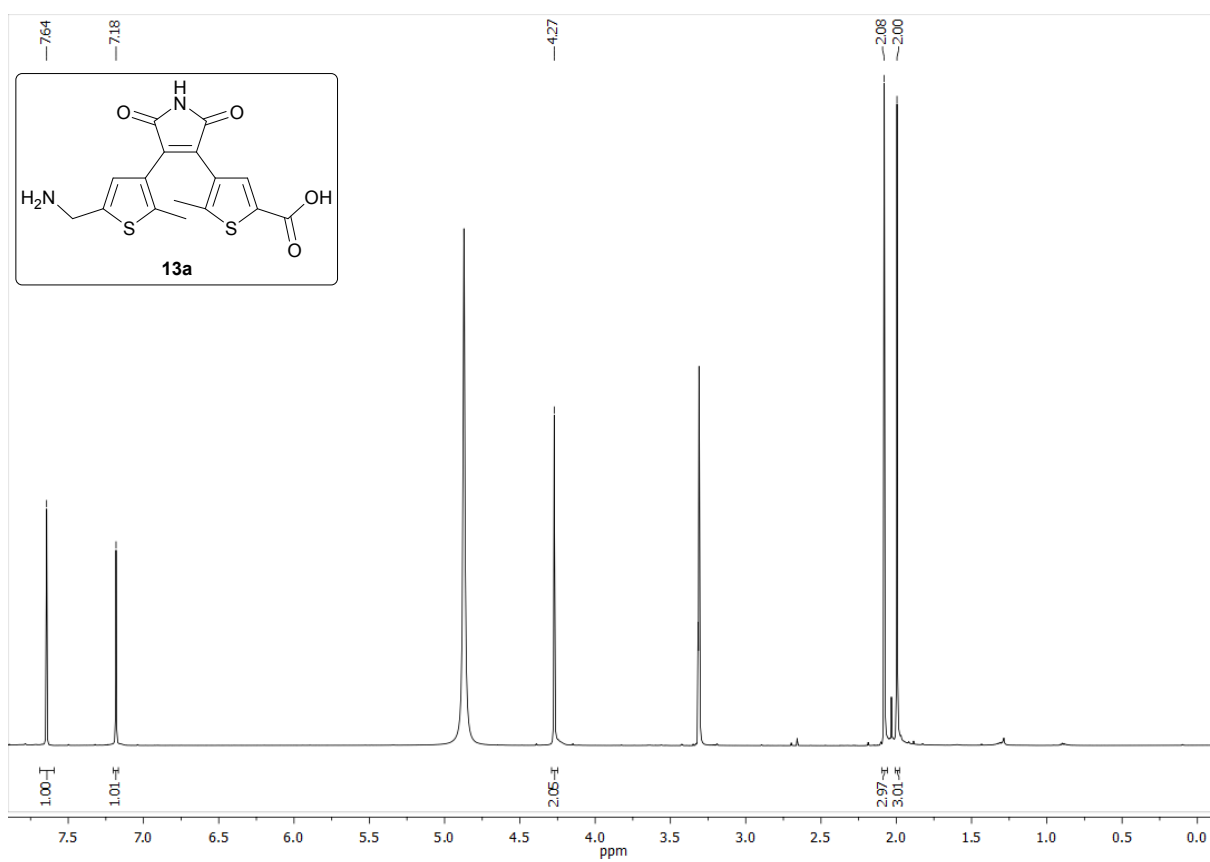

$^1\text{H}$ -NMR (600 MHz, MeOD) for compound **13a**:



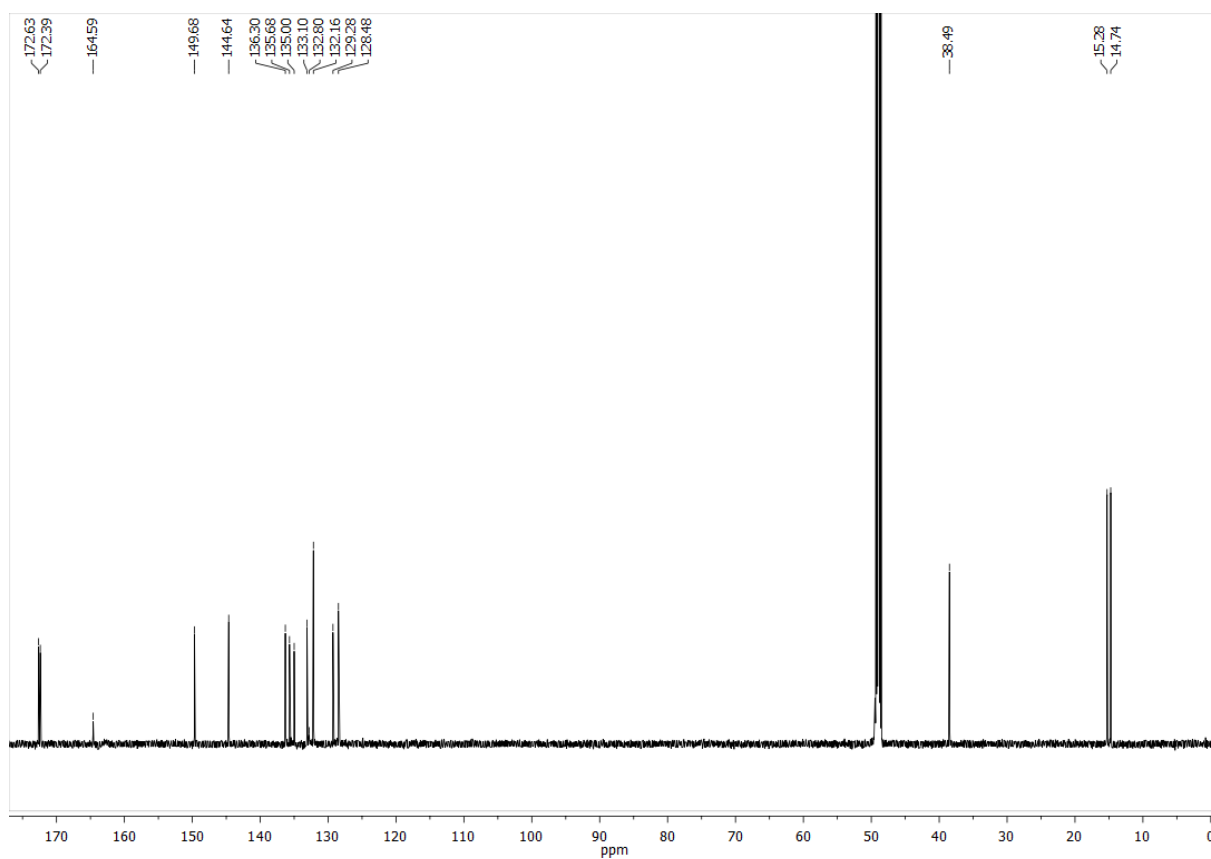

$^{13}\text{C}$ -NMR (75 MHz,  $\text{CD}_3\text{CN}$ ) for compound **13b**:

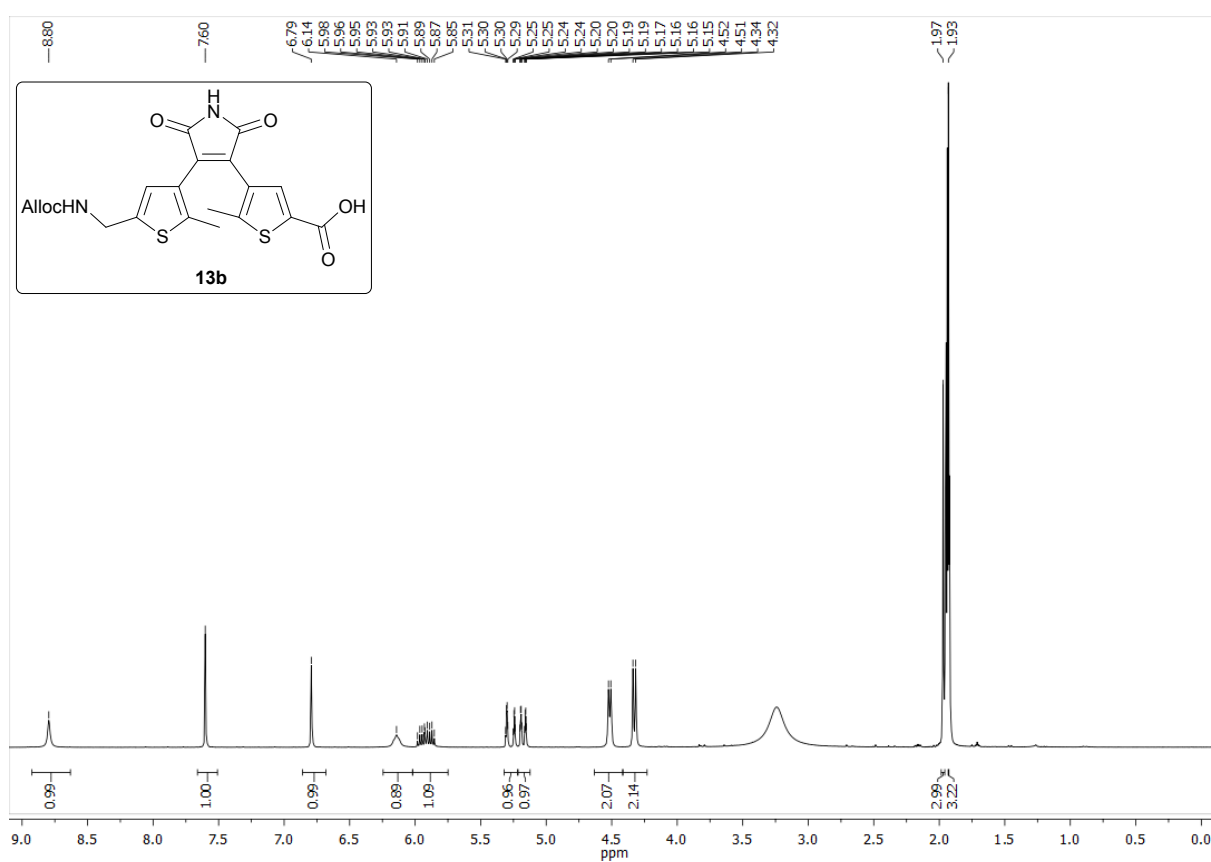

$^1\text{H}$ -NMR (300 MHz,  $\text{CD}_3\text{CN}$ ) for compound **13b**:

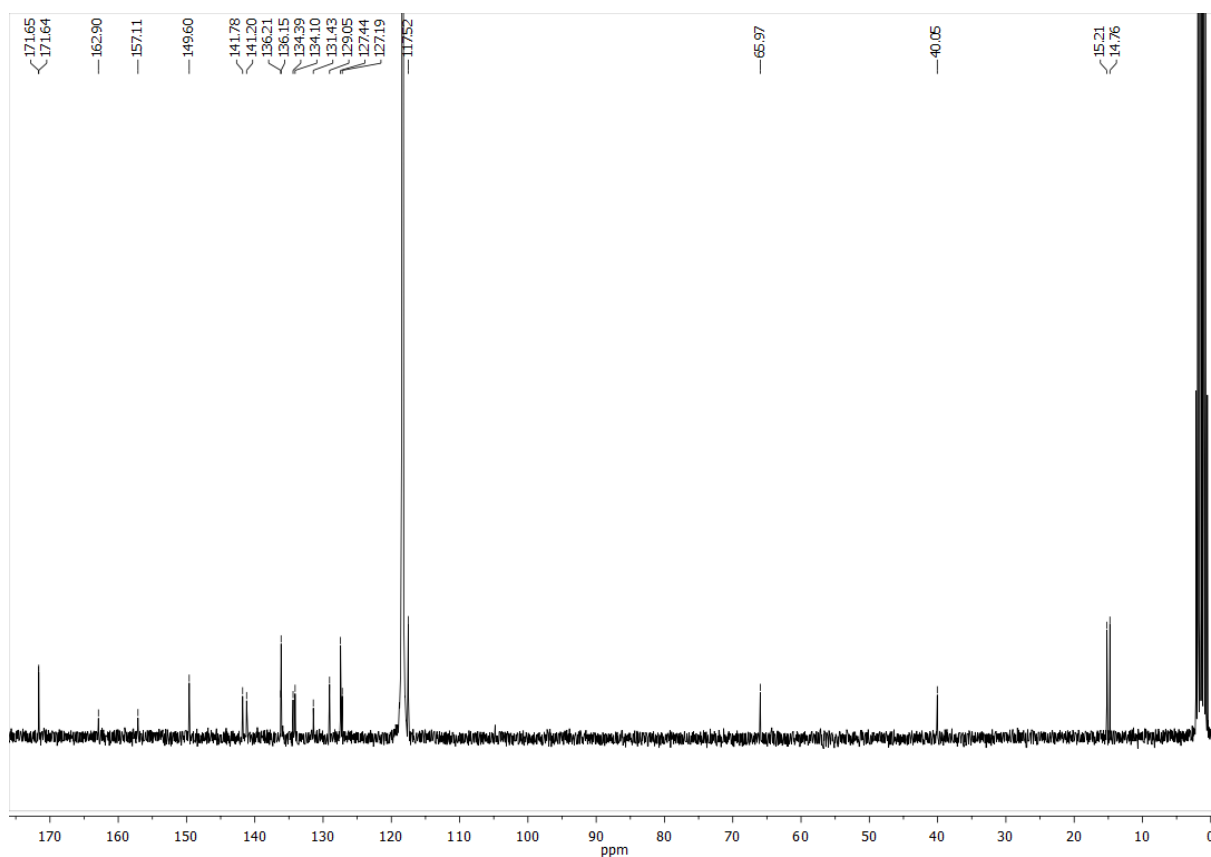

$^1\text{H-NMR}$  (300 MHz,  $\text{DMSO-}d_6$ ) for compound **13S**:

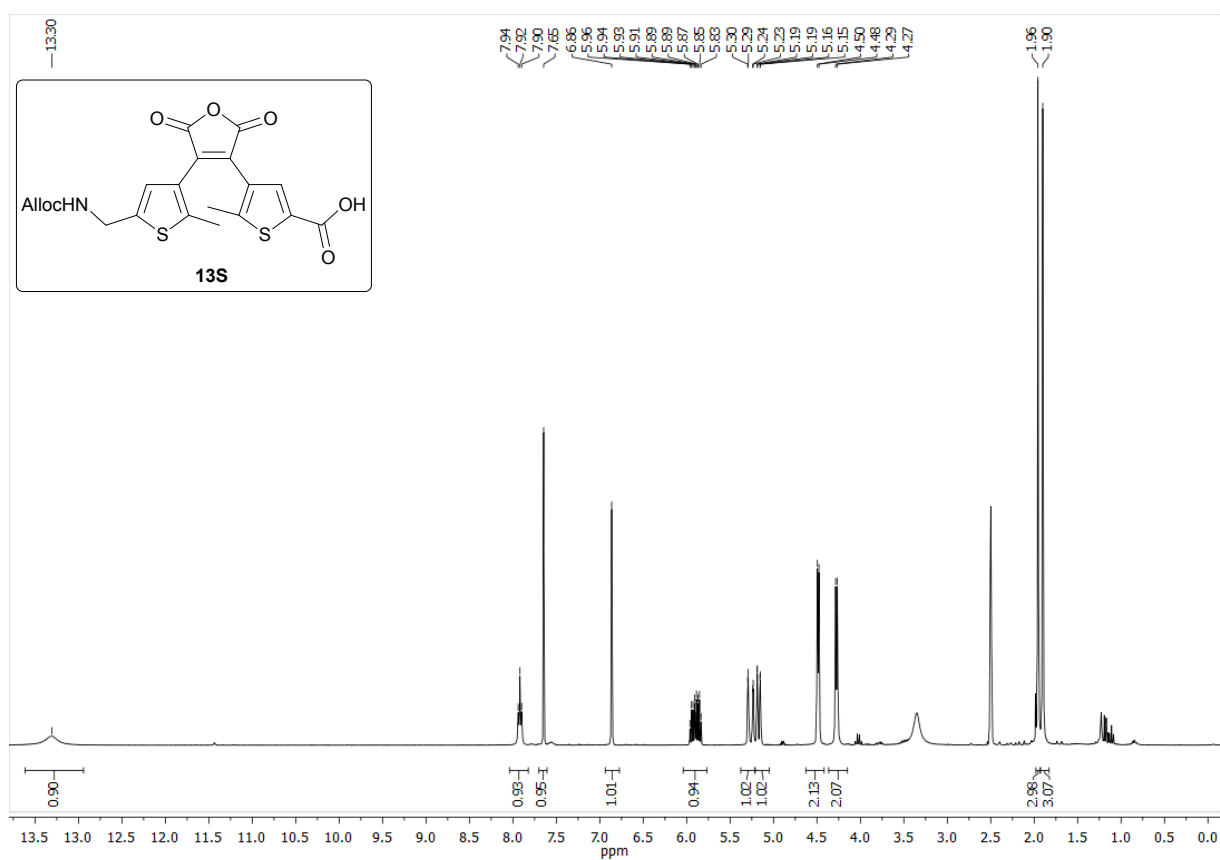

$^{13}\text{C-NMR}$  (75 MHz,  $\text{DMSO-}d_6$ ) for compound **13S**:

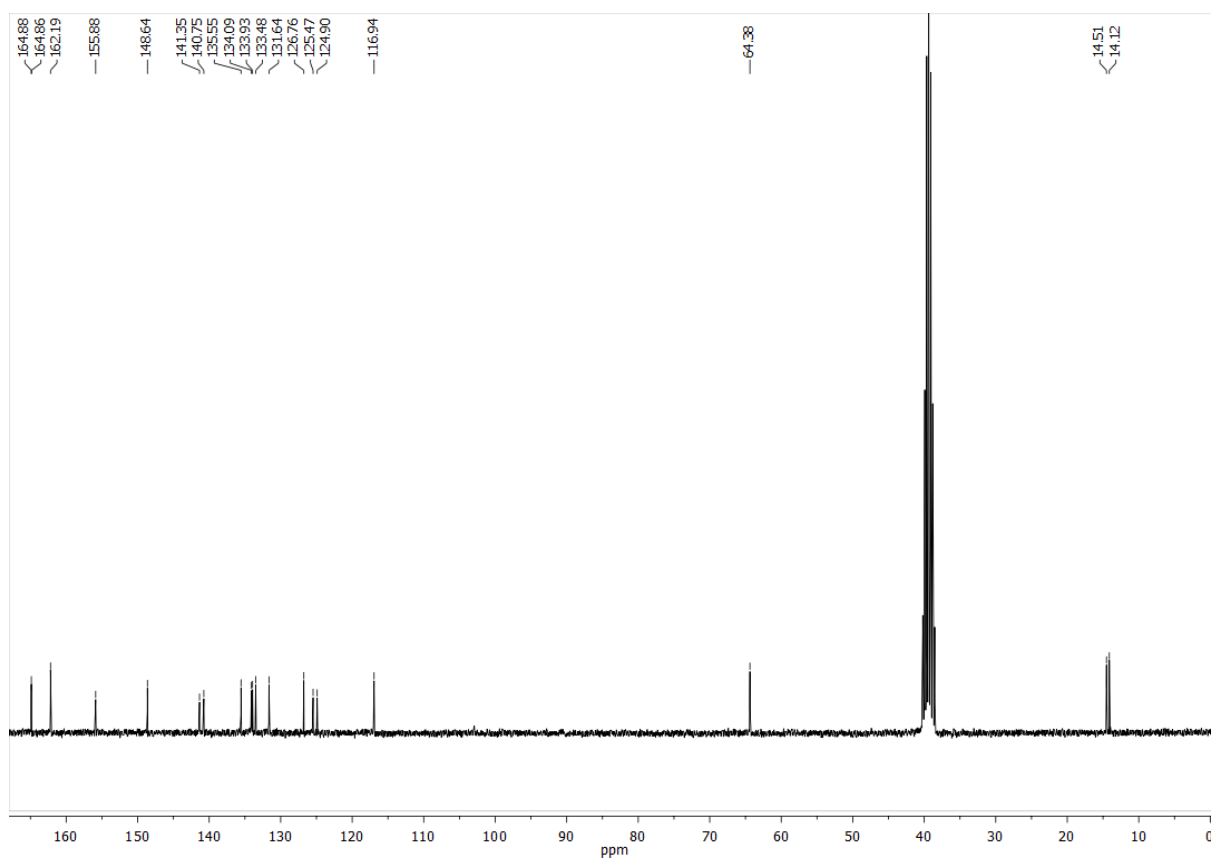

<sup>1</sup>H-NMR (400 MHz, CDCl<sub>3</sub>) for compound **17**:

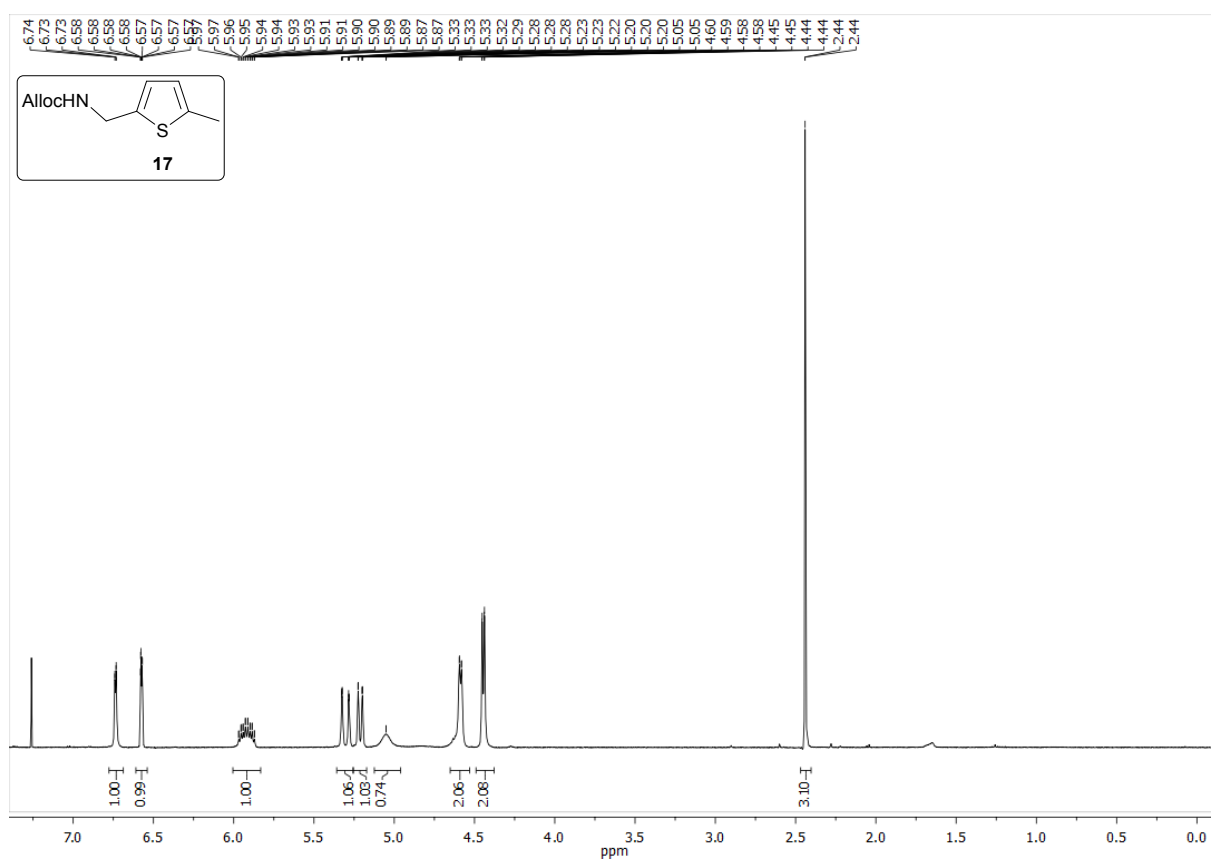

<sup>13</sup>C-NMR (101 MHz, CDCl<sub>3</sub>) for compound **17**:

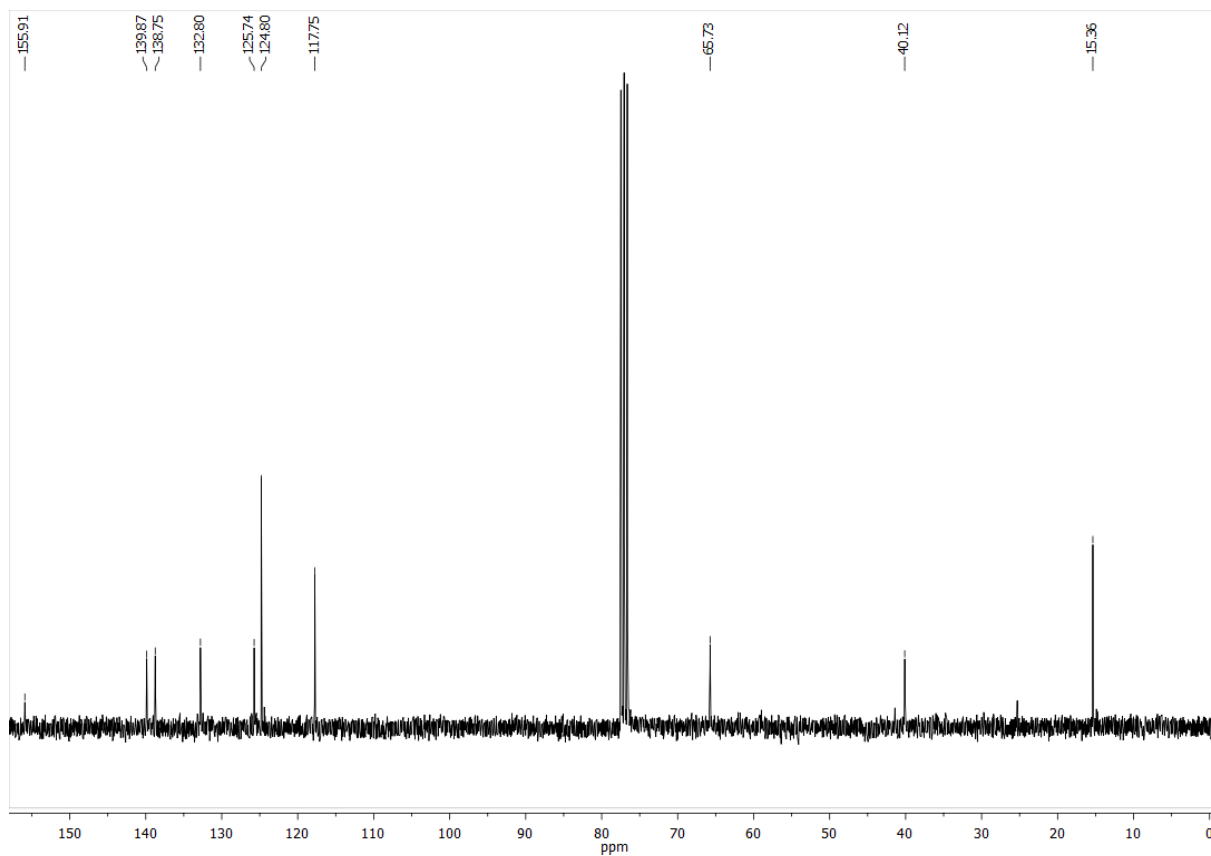

$^{13}\text{C}$ -NMR (101 MHz,  $\text{CDCl}_3$ ) for compound **18**:

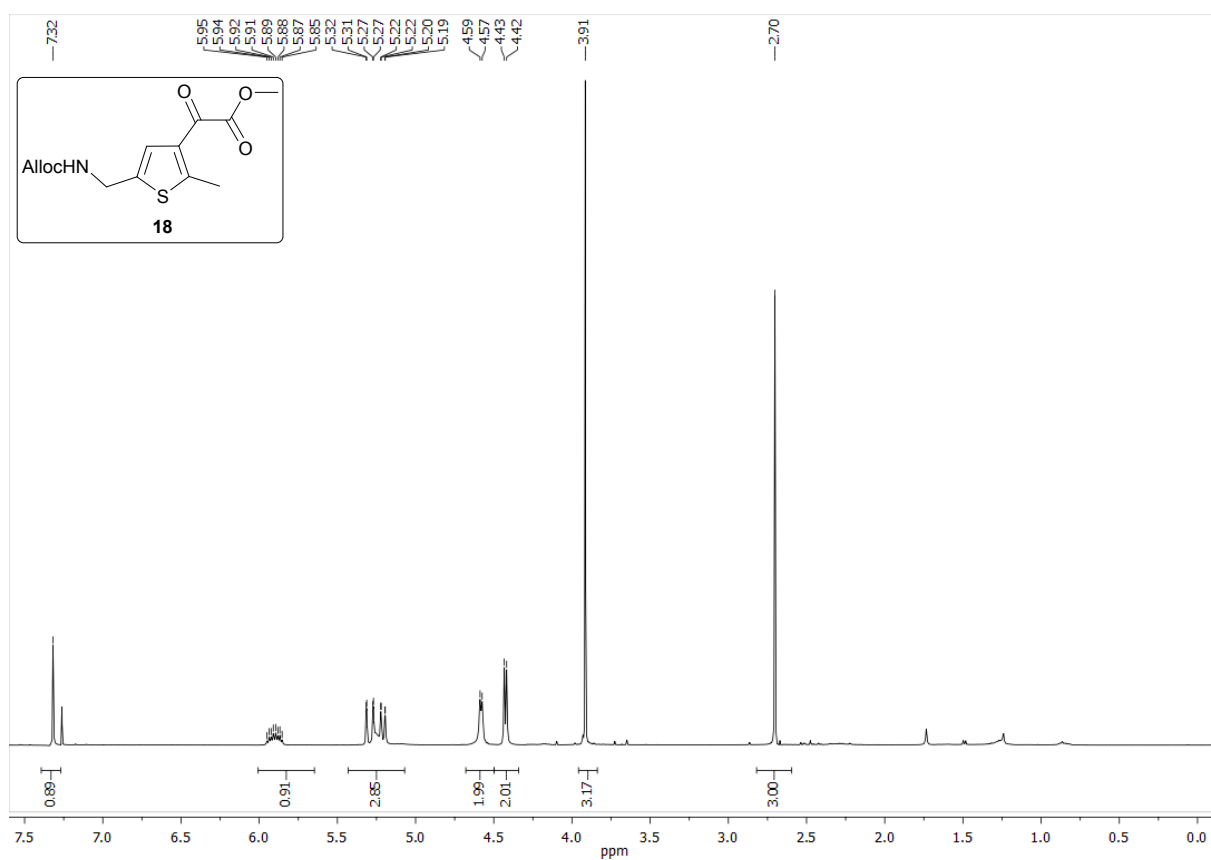

$^1\text{H}$ -NMR (400 MHz,  $\text{CDCl}_3$ ) for compound **18**:

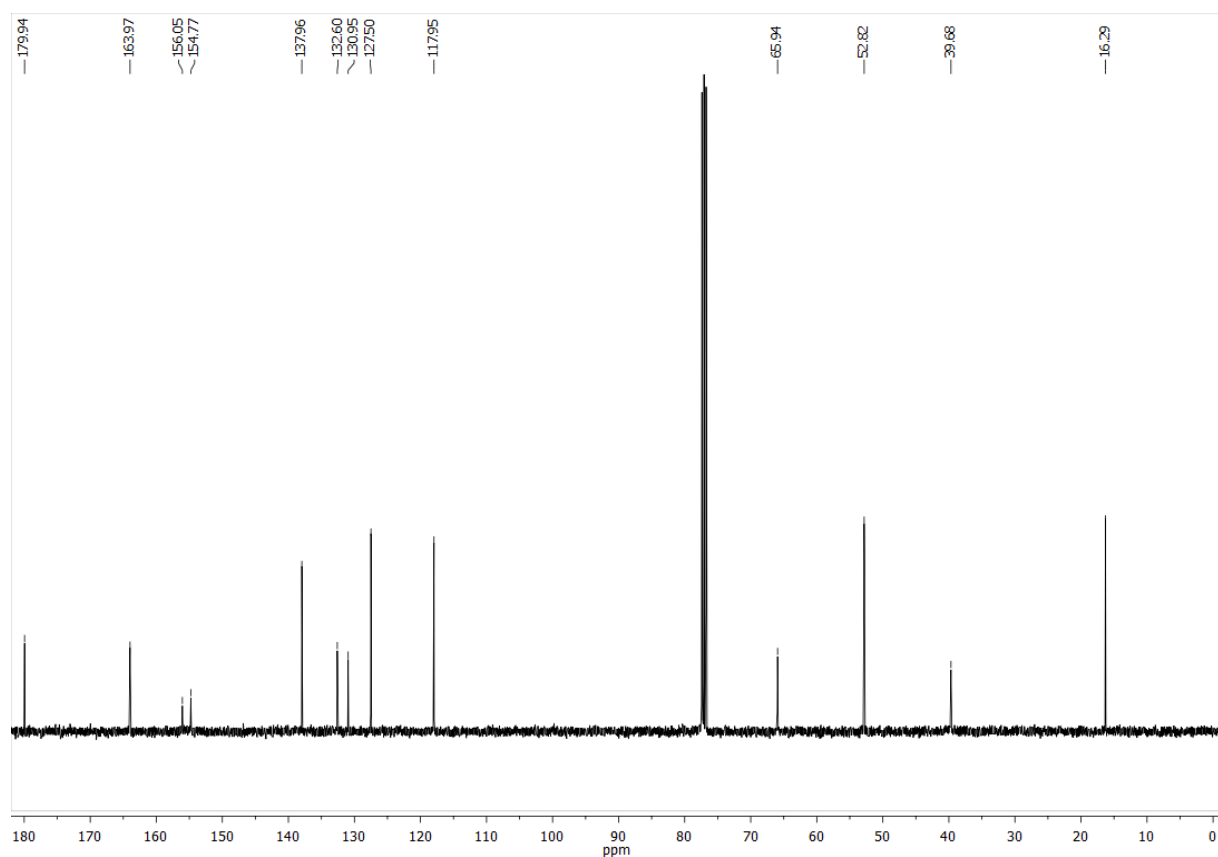

$^{13}\text{C}$ -NMR (75 MHz,  $\text{CDCl}_3$ ) for compound **21**:

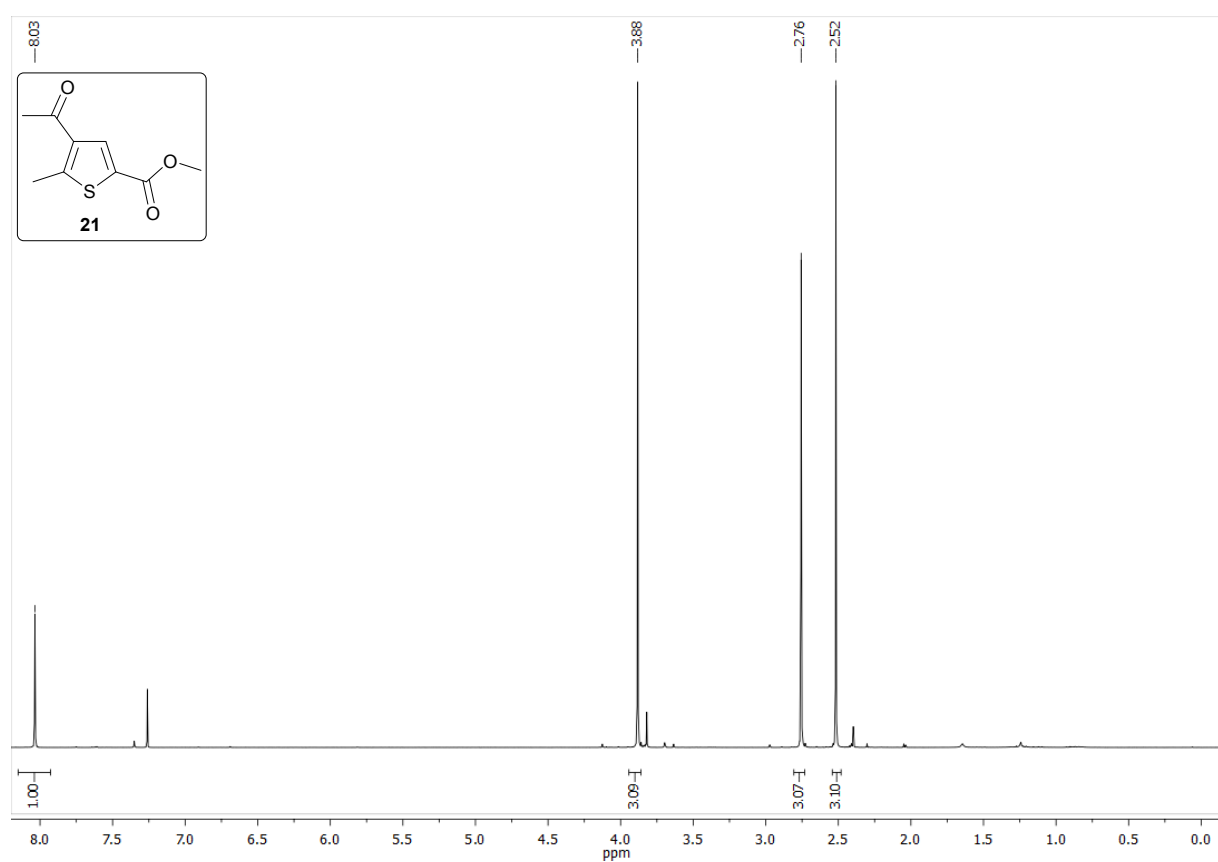

$^1\text{H}$ -NMR (300 MHz,  $\text{CDCl}_3$ ) for compound **21**:

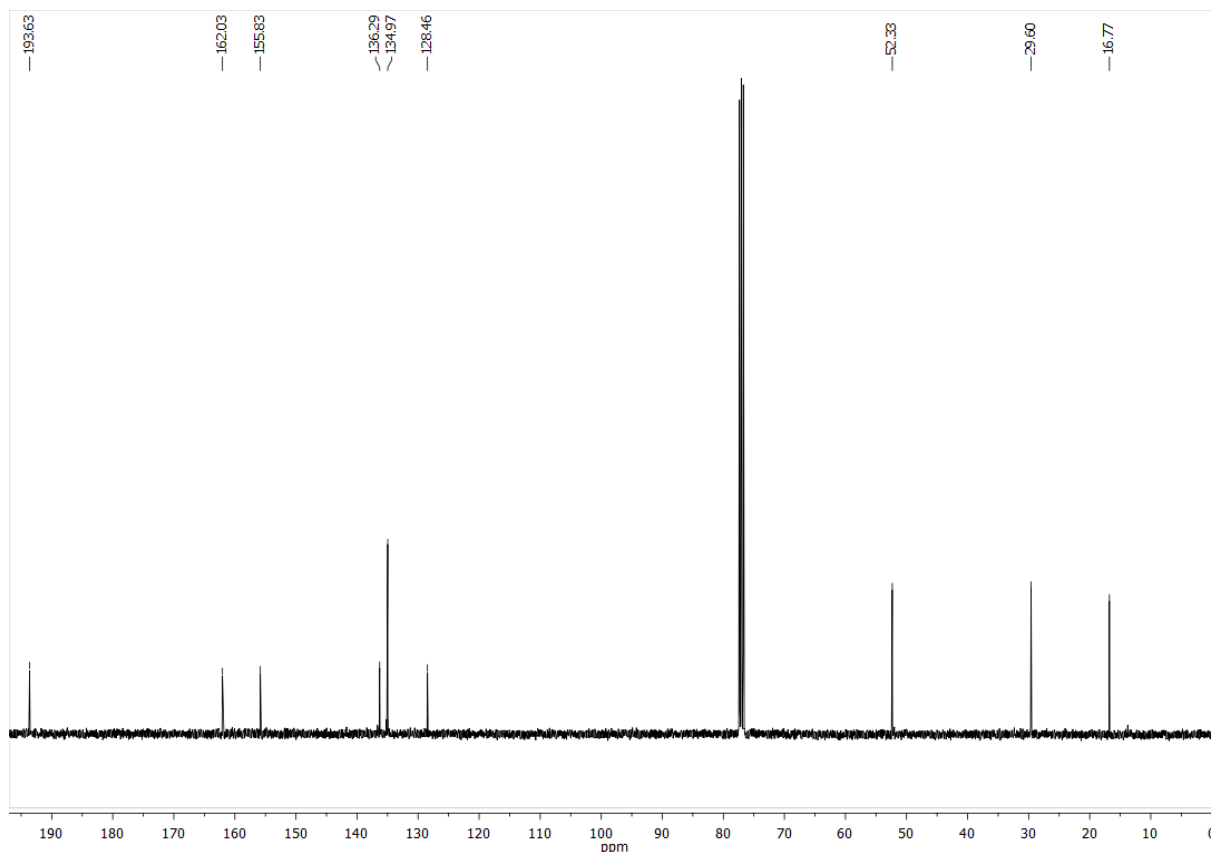

$^{13}\text{C}$ -NMR (101 MHz,  $\text{CDCl}_3$ ) for compound **21S**:

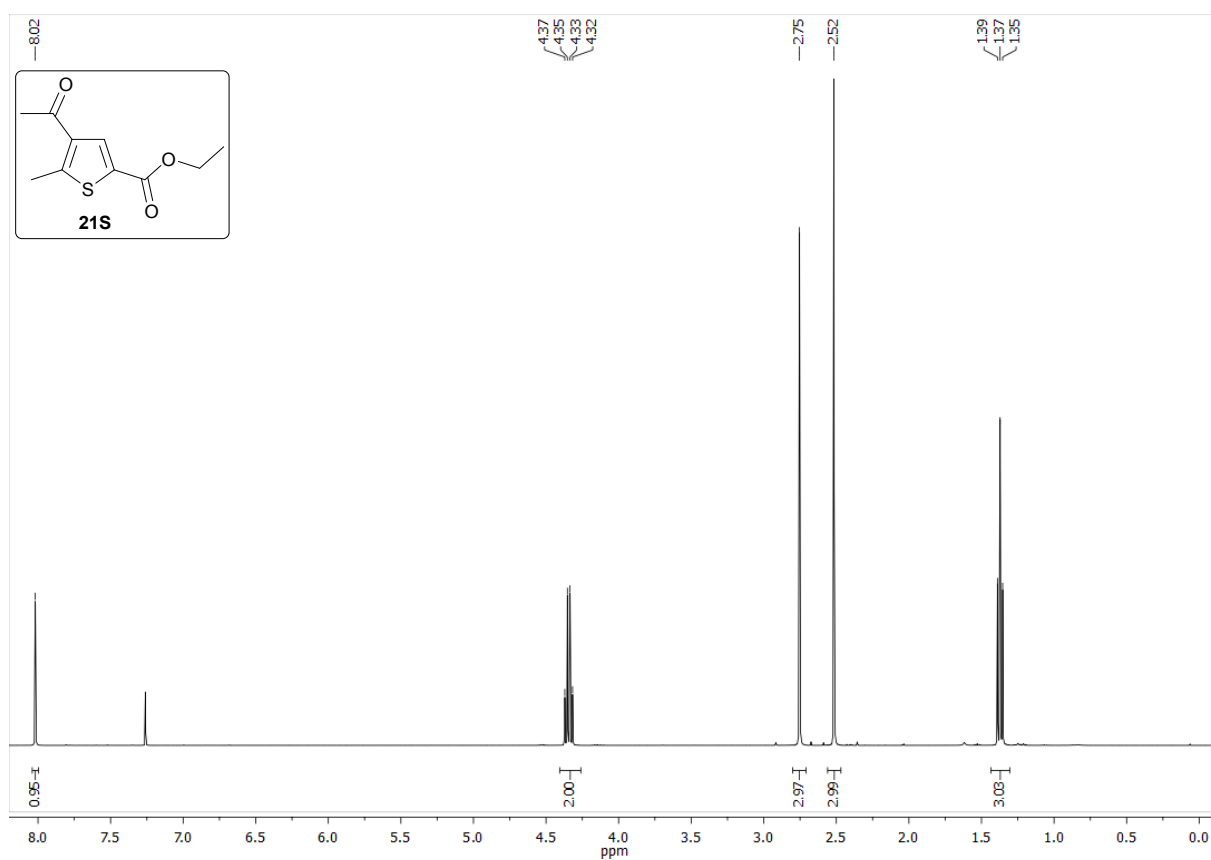

$^1\text{H}$ -NMR (400 MHz,  $\text{CDCl}_3$ ) for compound **21S**:

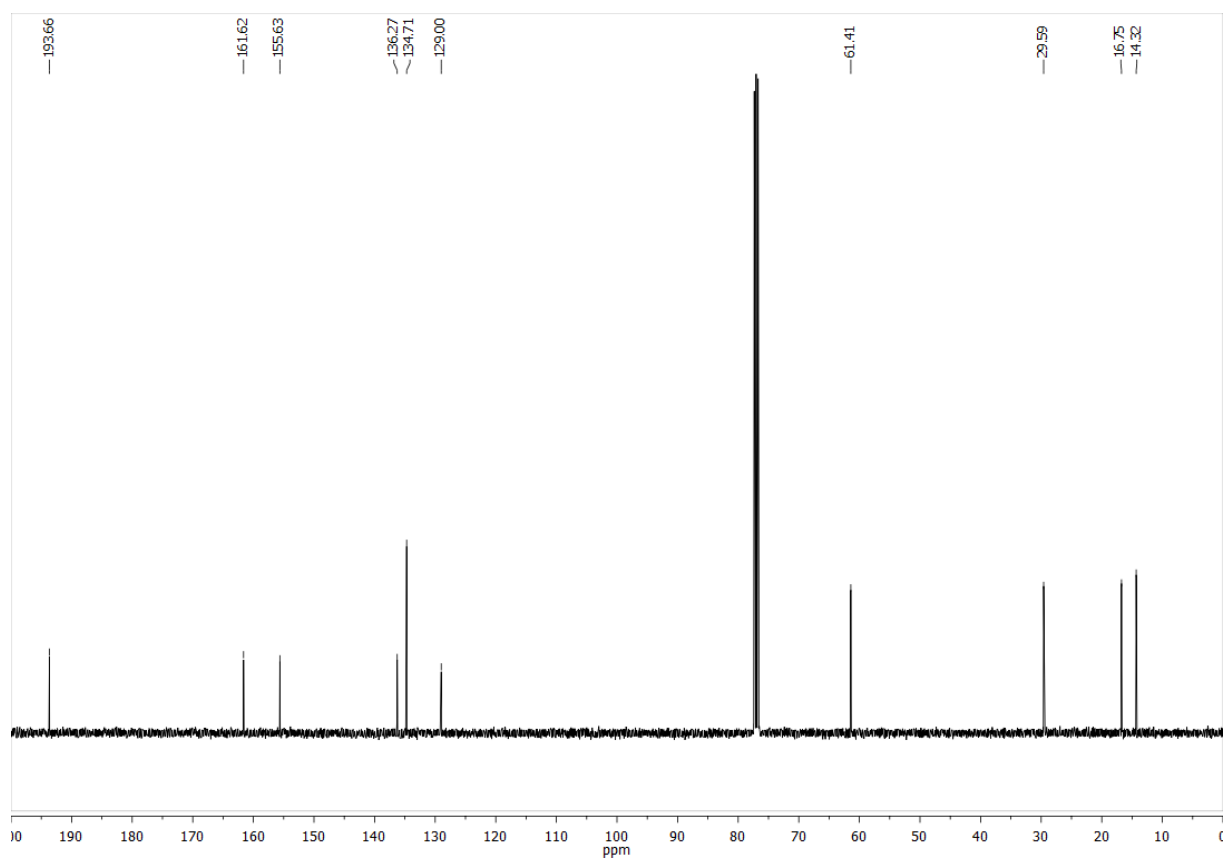

$^{13}\text{C}$ -NMR (75 MHz,  $\text{DMSO}-d_6$ ) for compound **23**:

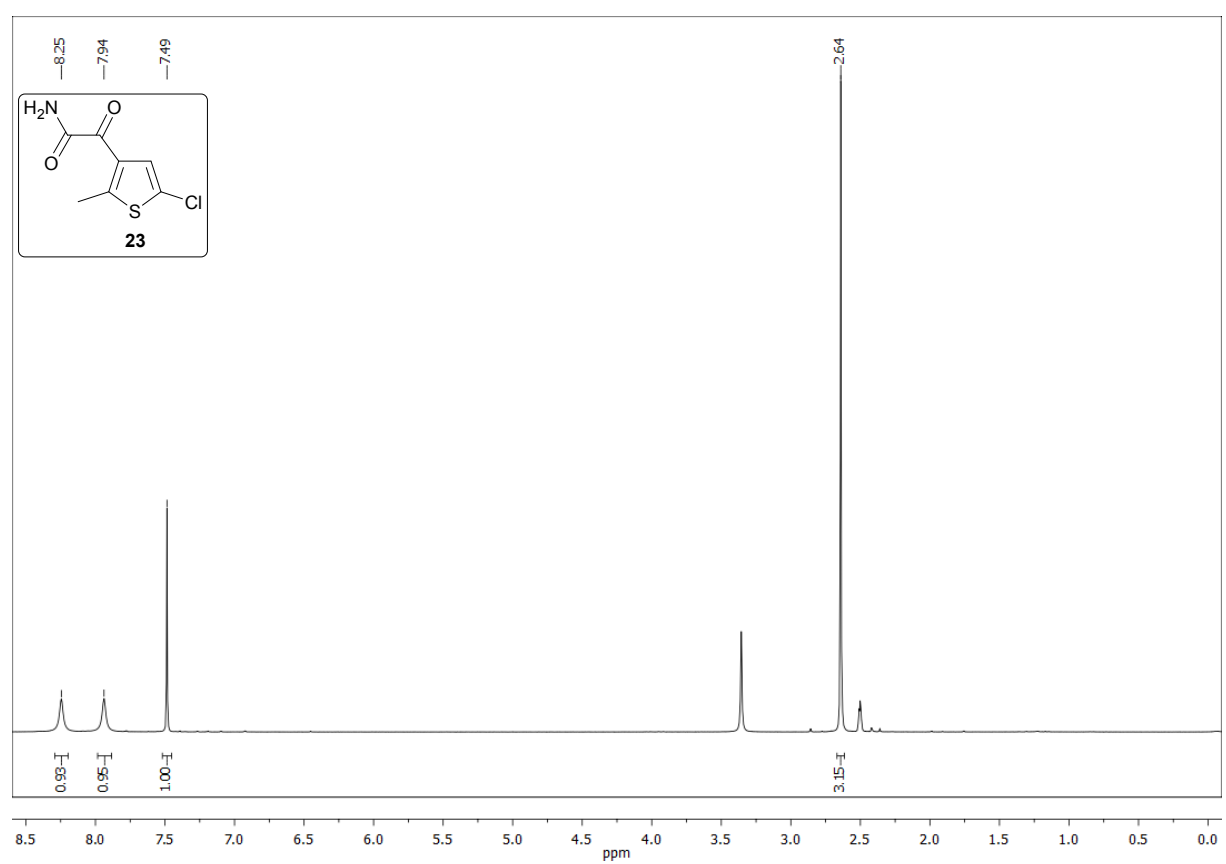

$^1\text{H}$ -NMR (300 MHz,  $\text{DMSO}-d_6$ ) for compound **23**:

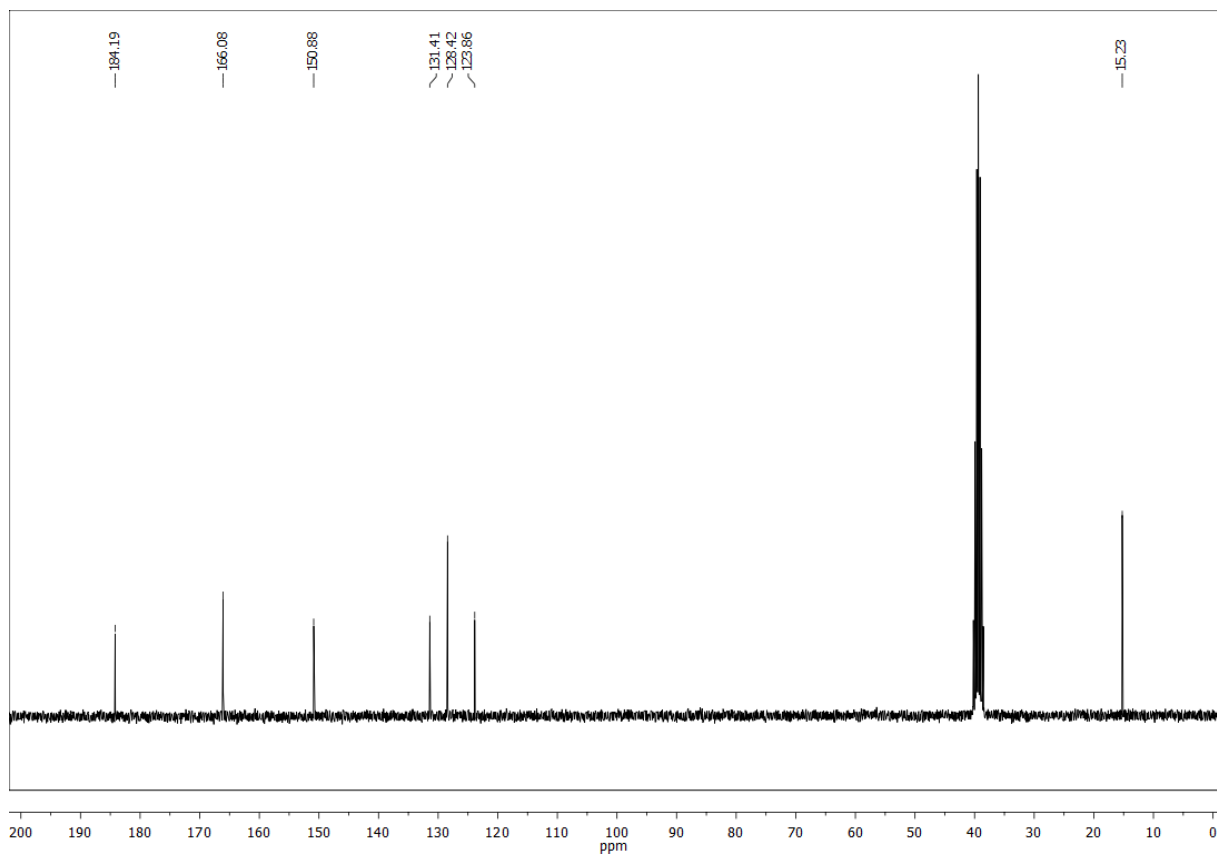

$^1\text{H}$ -NMR (400 MHz,  $\text{DMSO-}d_6$ ) for compound **24**:

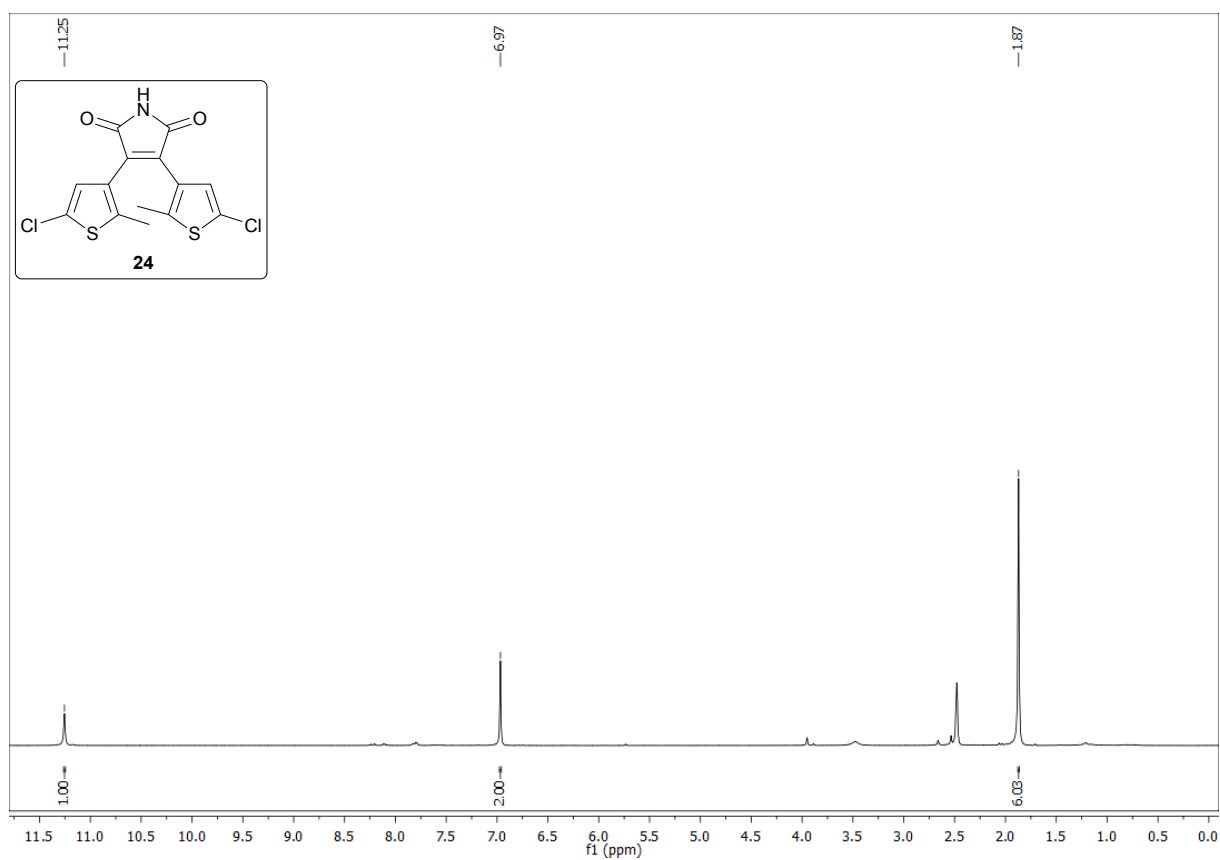

$^{13}\text{C}$ -NMR (101 MHz,  $\text{DMSO-}d_6$ ) for compound **24**:



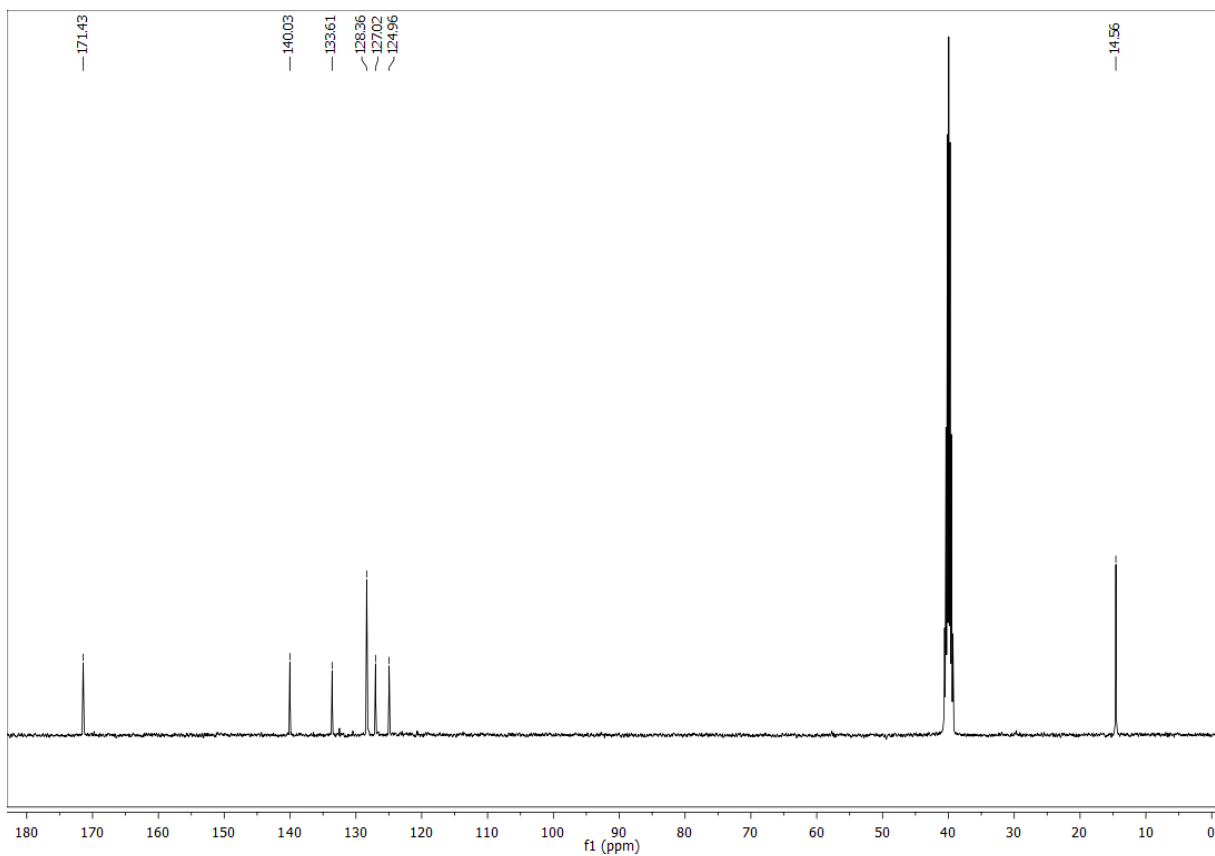

<sup>1</sup>H-NMR (300 MHz, CDCl<sub>3</sub>) for compound **26**:

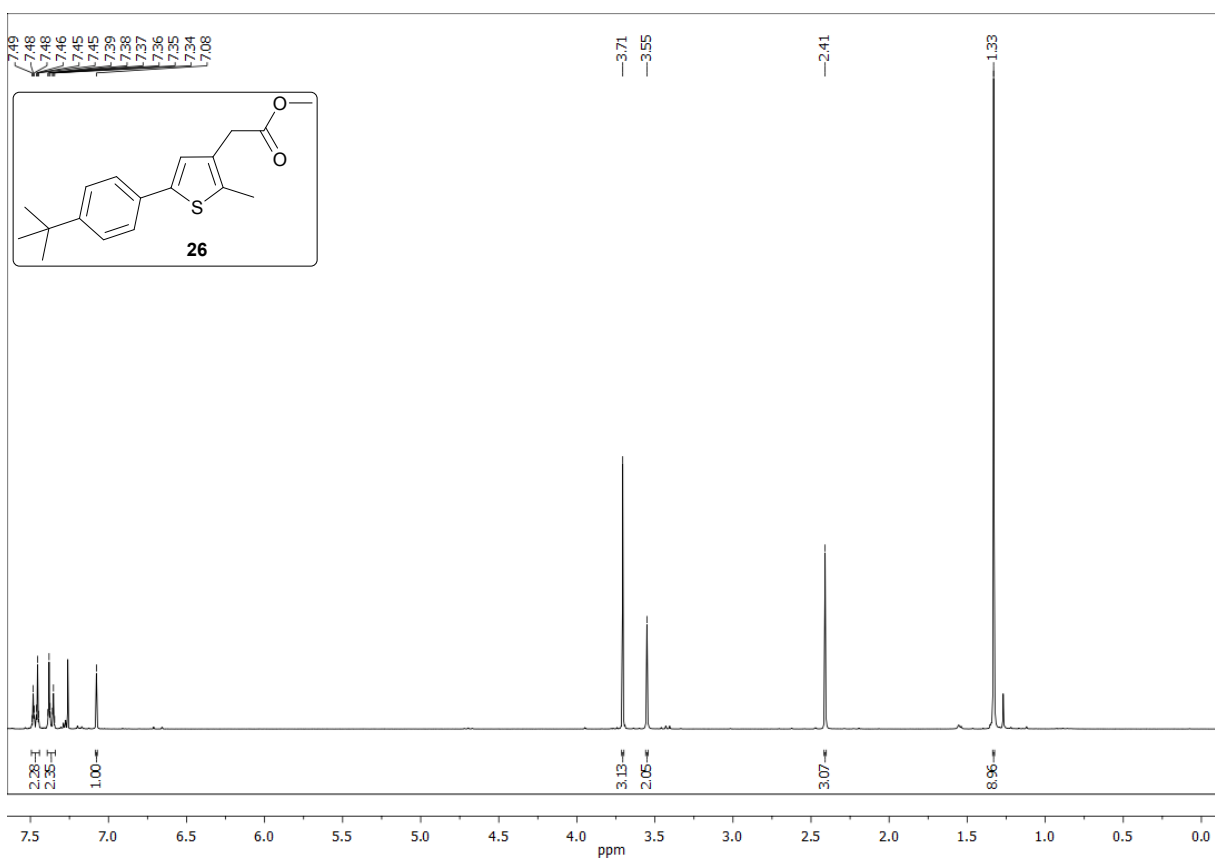

<sup>13</sup>C-NMR (75 MHz, CDCl<sub>3</sub>) for compound **26**:

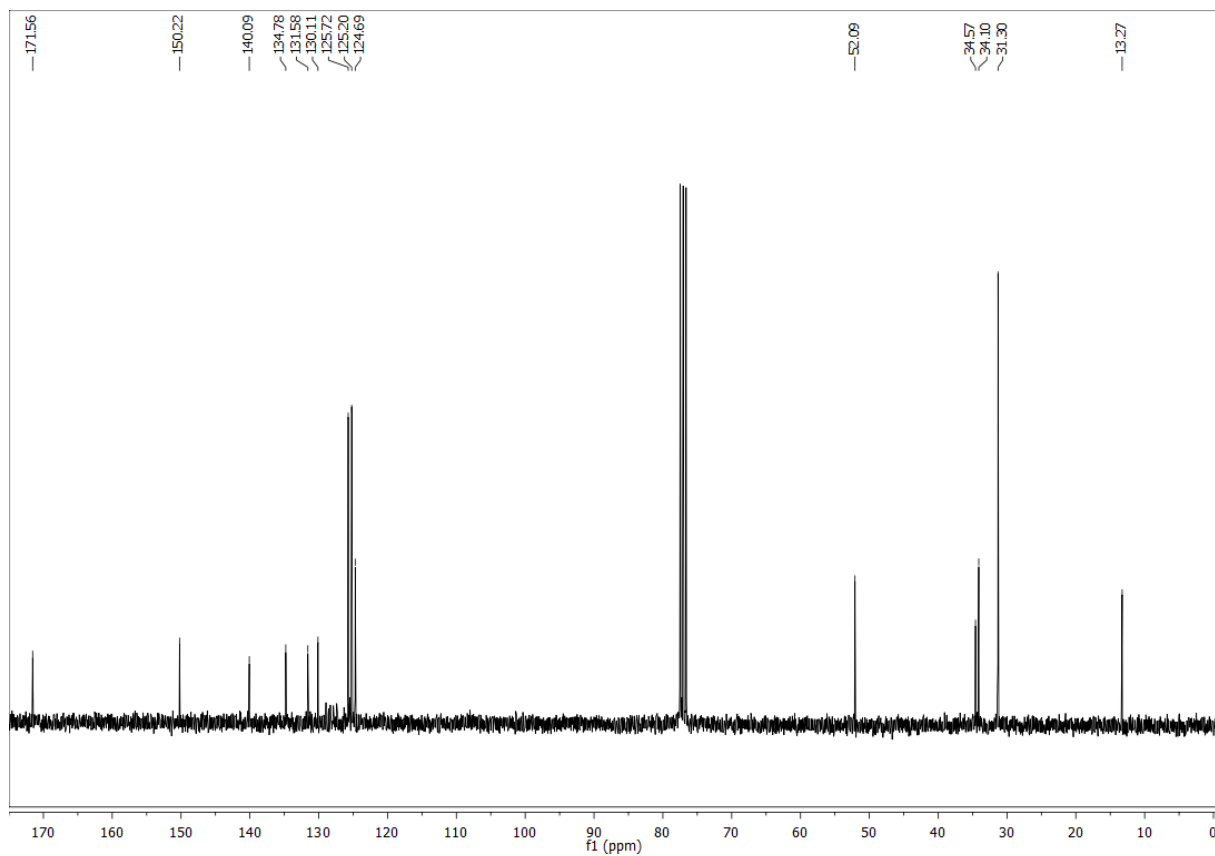

$^1\text{H-NMR}$  (300 MHz,  $\text{CDCl}_3$ ) for compound **27**:

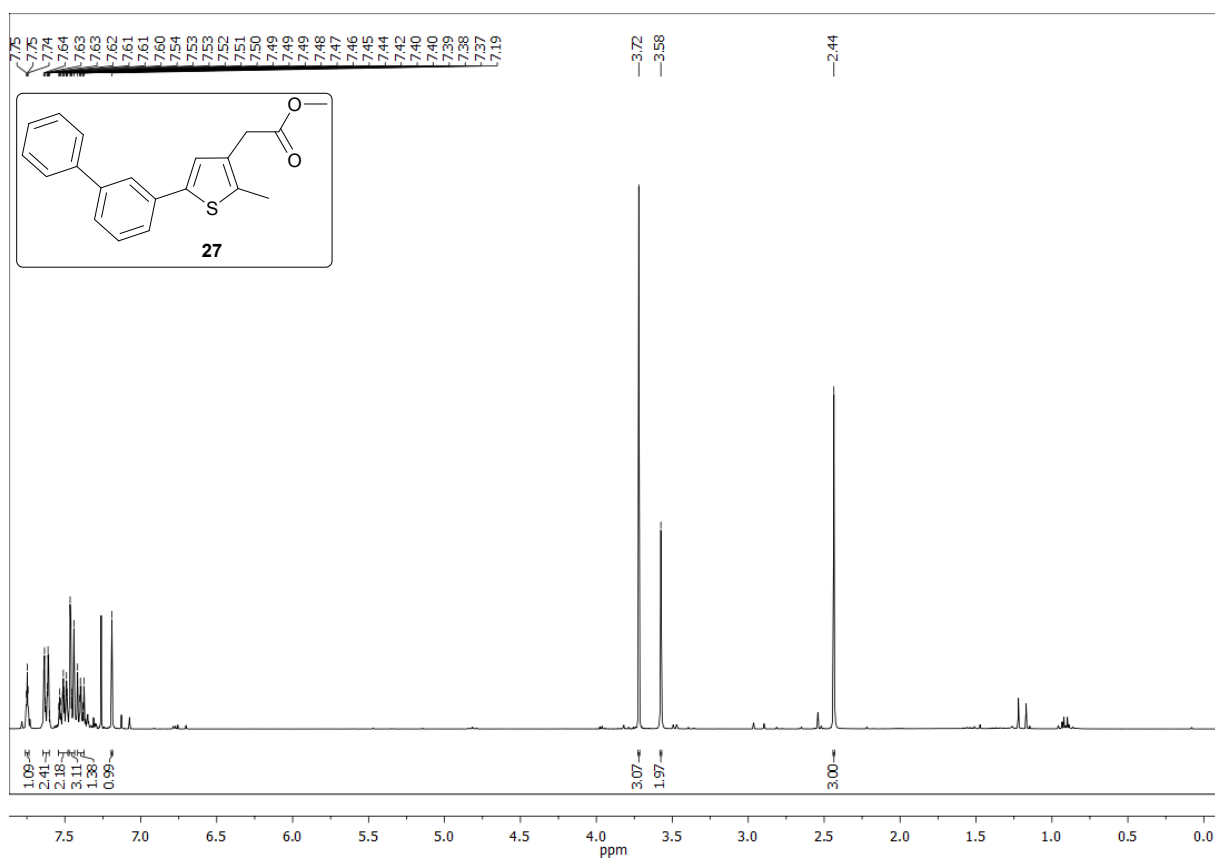

$^{13}\text{C-NMR}$  (75 MHz,  $\text{CDCl}_3$ ) for compound **27**:

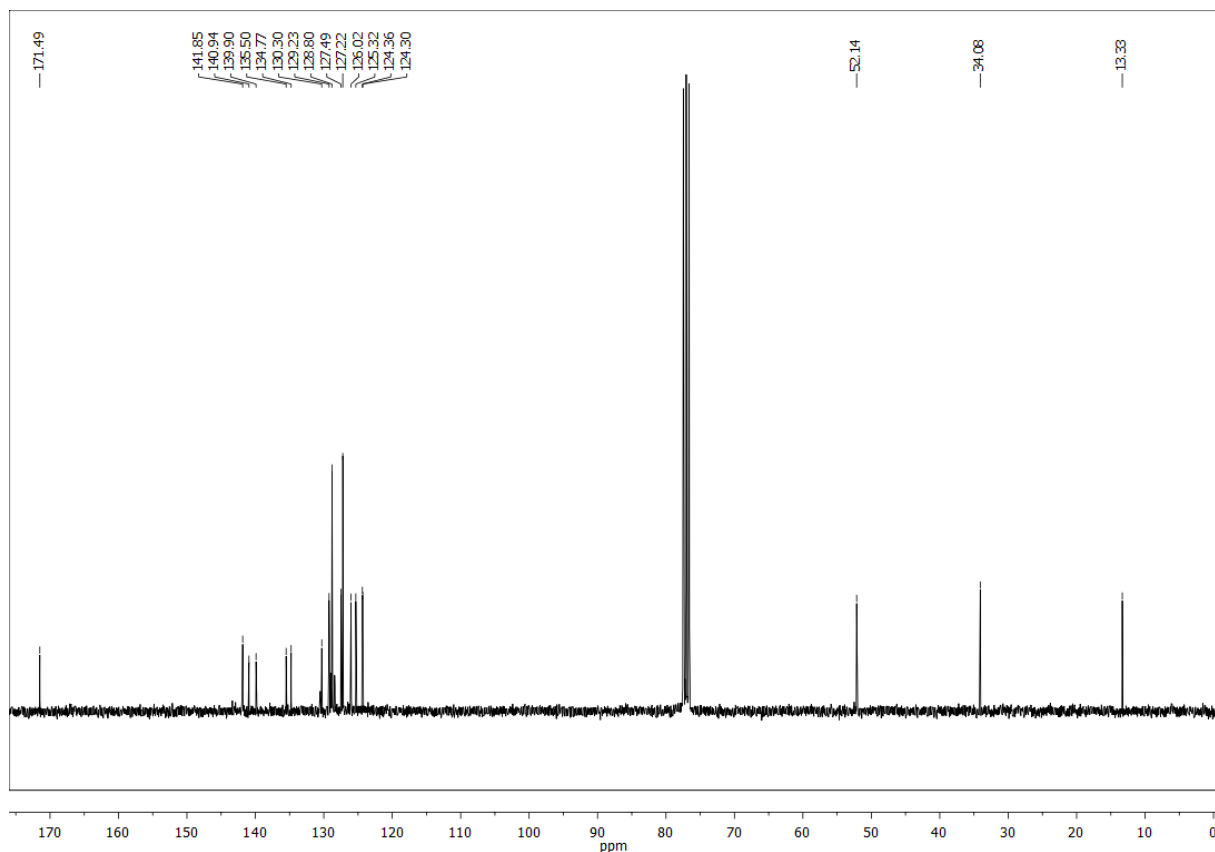

$^{13}\text{C}$ -NMR (75 MHz,  $\text{CDCl}_3$ ) for compound **30**:

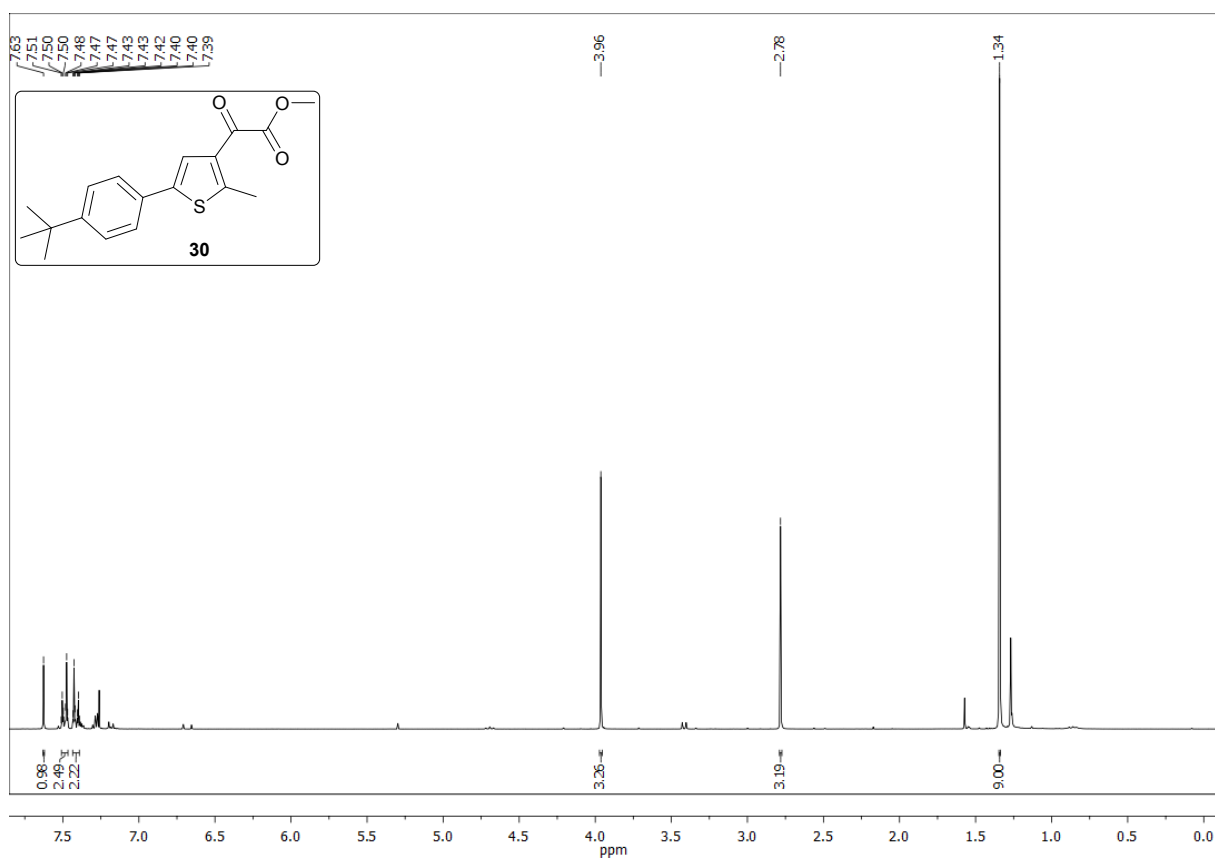

$^1\text{H}$ -NMR (300 MHz,  $\text{CDCl}_3$ ) for compound **30**:

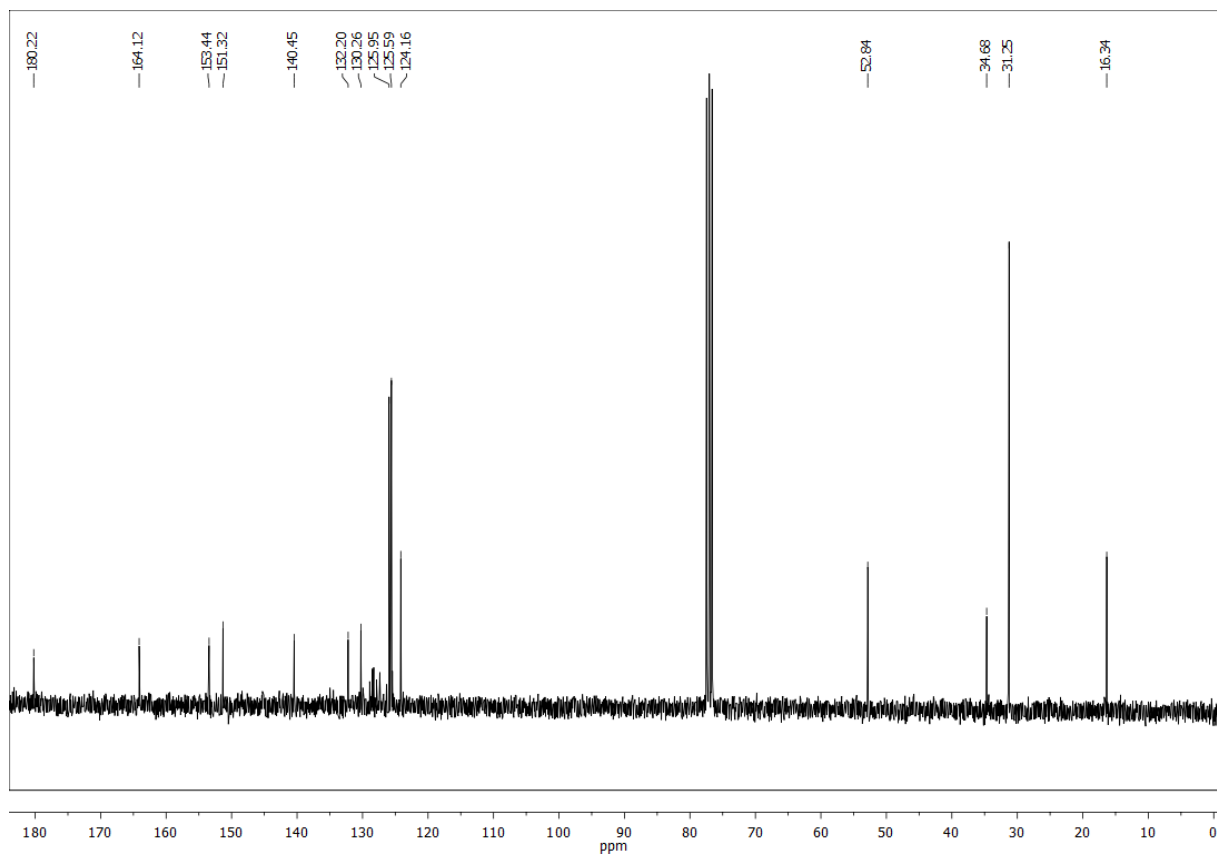

$^1\text{H-NMR}$  (300 MHz,  $\text{CDCl}_3$ ) for compound **31**:

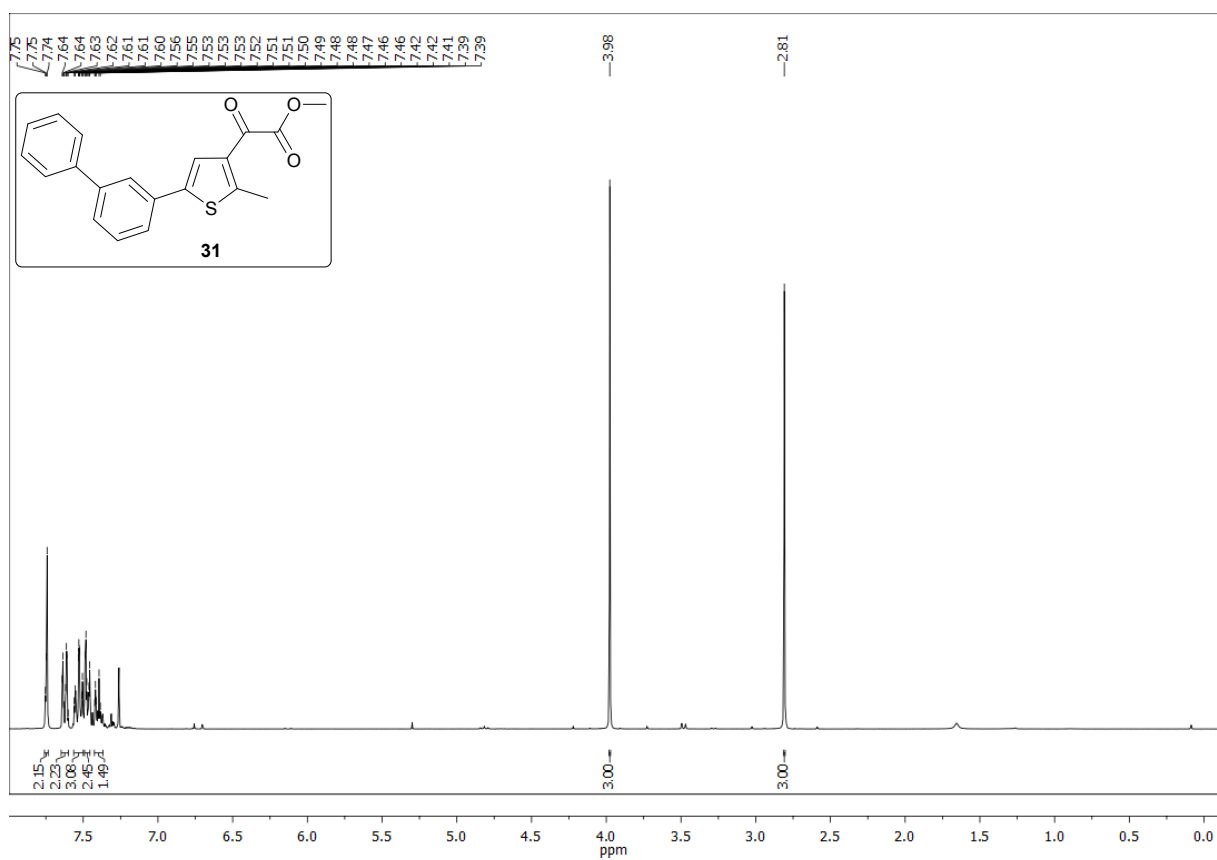

$^{13}\text{C-NMR}$  (75 MHz,  $\text{CDCl}_3$ ) for compound **31**:

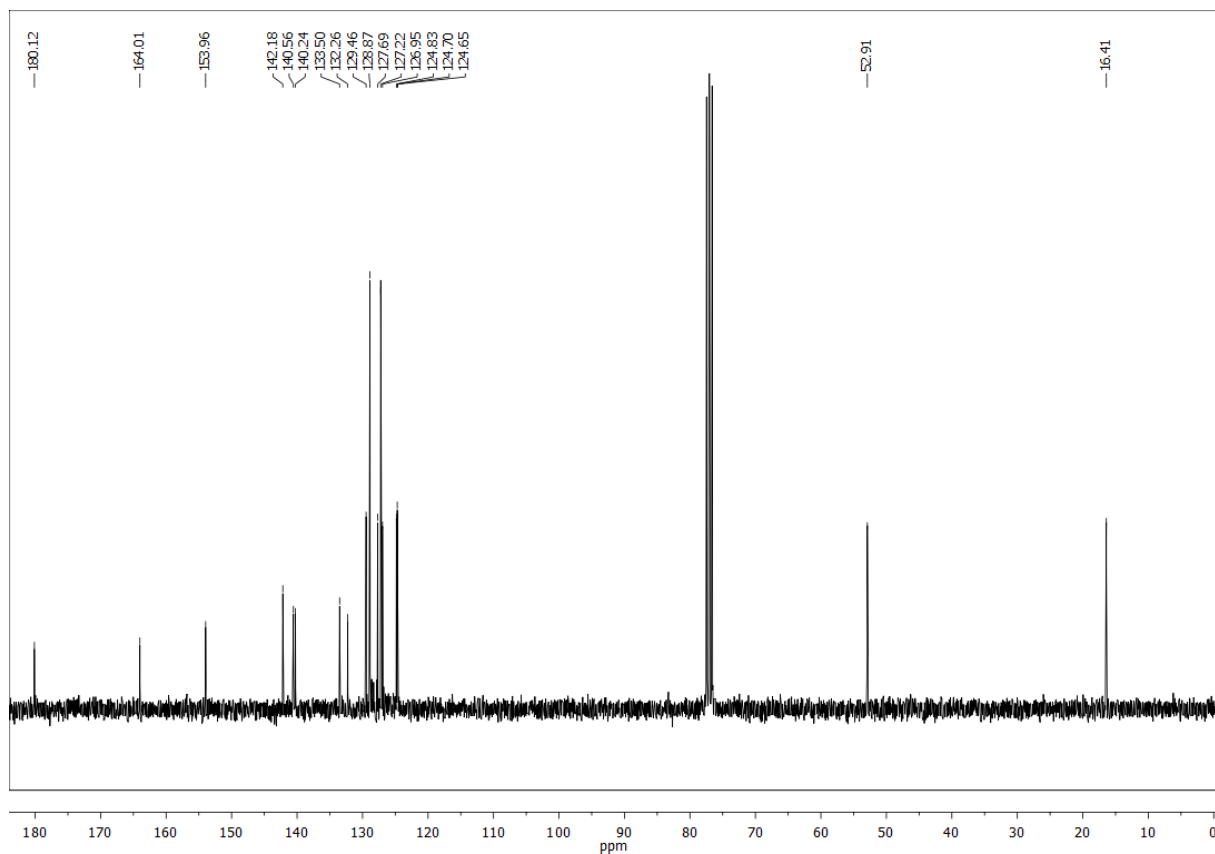

$^1\text{H-NMR}$  (300 MHz,  $\text{DMSO-}d_6$ ) for compound **33**:

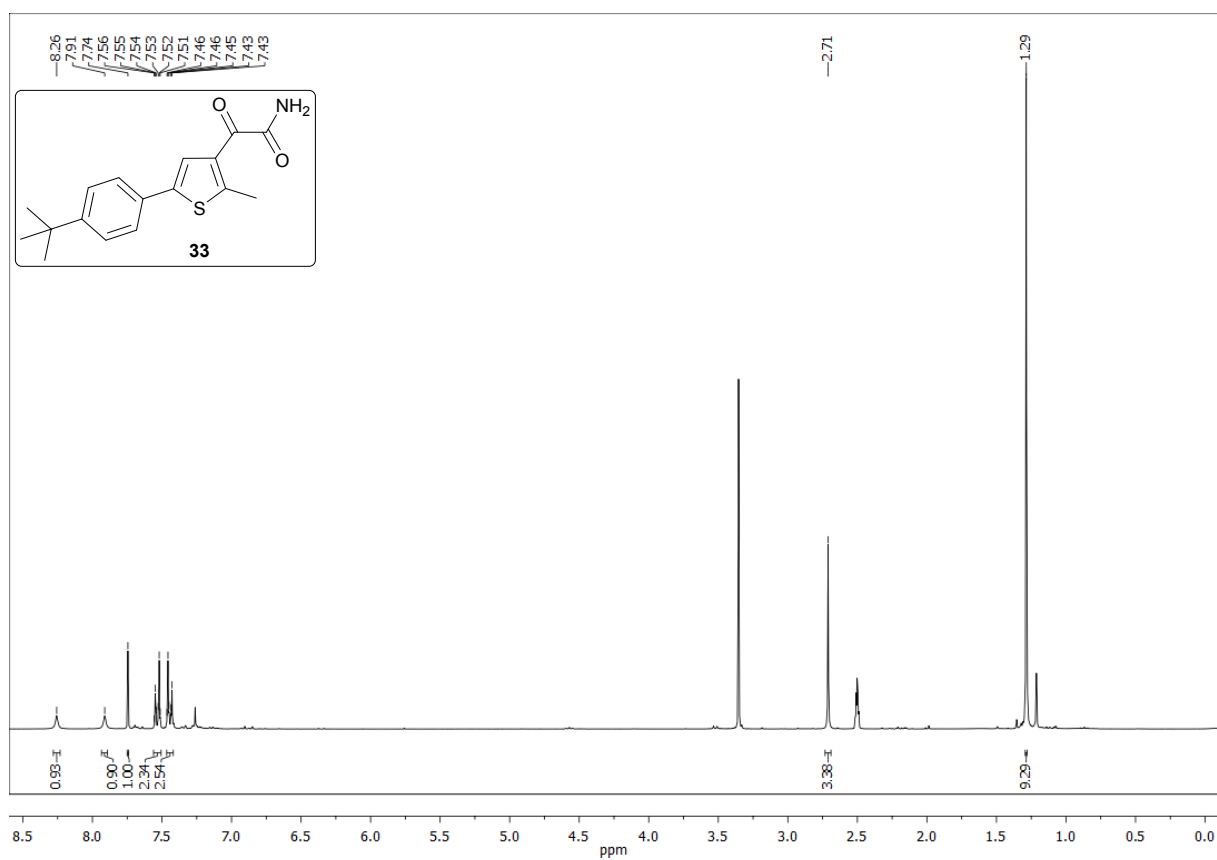

$^{13}\text{C-NMR}$  (75 MHz,  $\text{DMSO-}d_6$ ) for compound **33**:

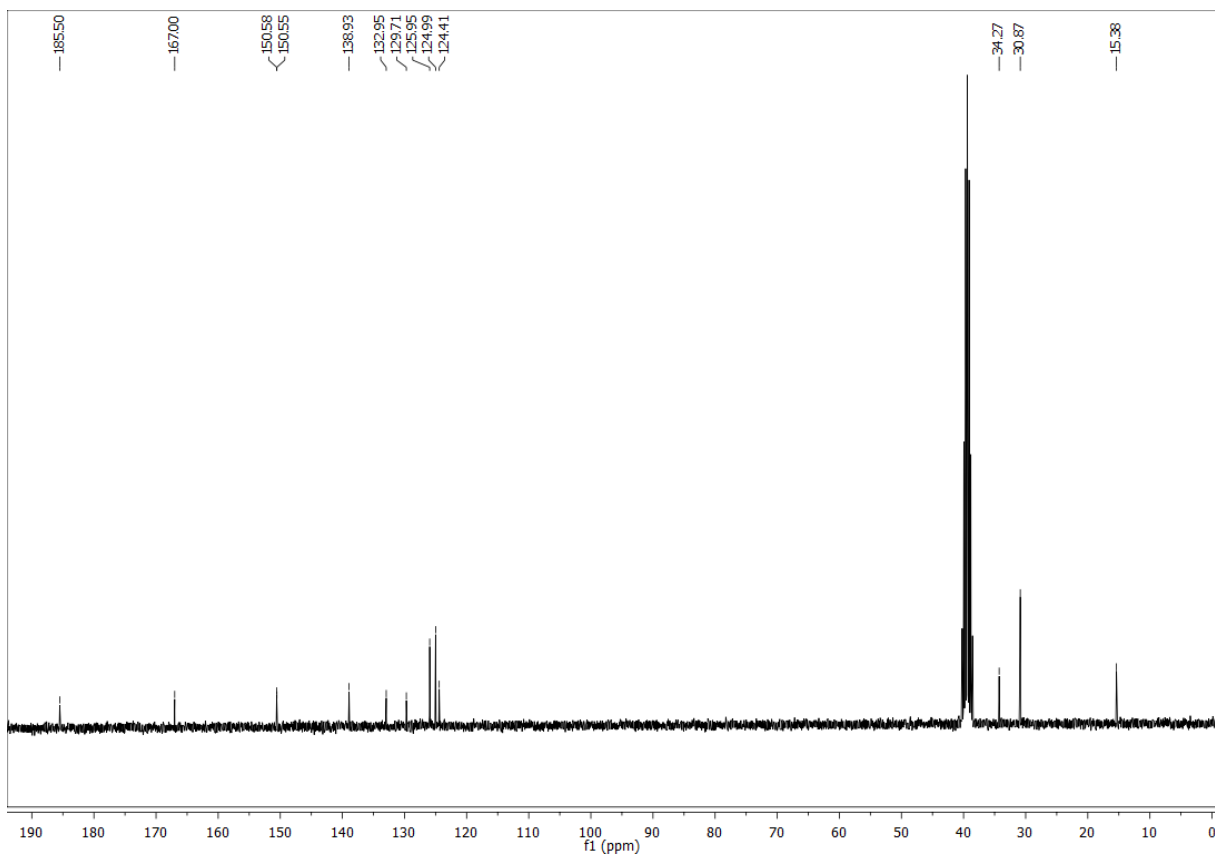

$^{13}\text{C-NMR}$  (300 MHz,  $\text{DMSO-}d_6$ ) for compound **34**:

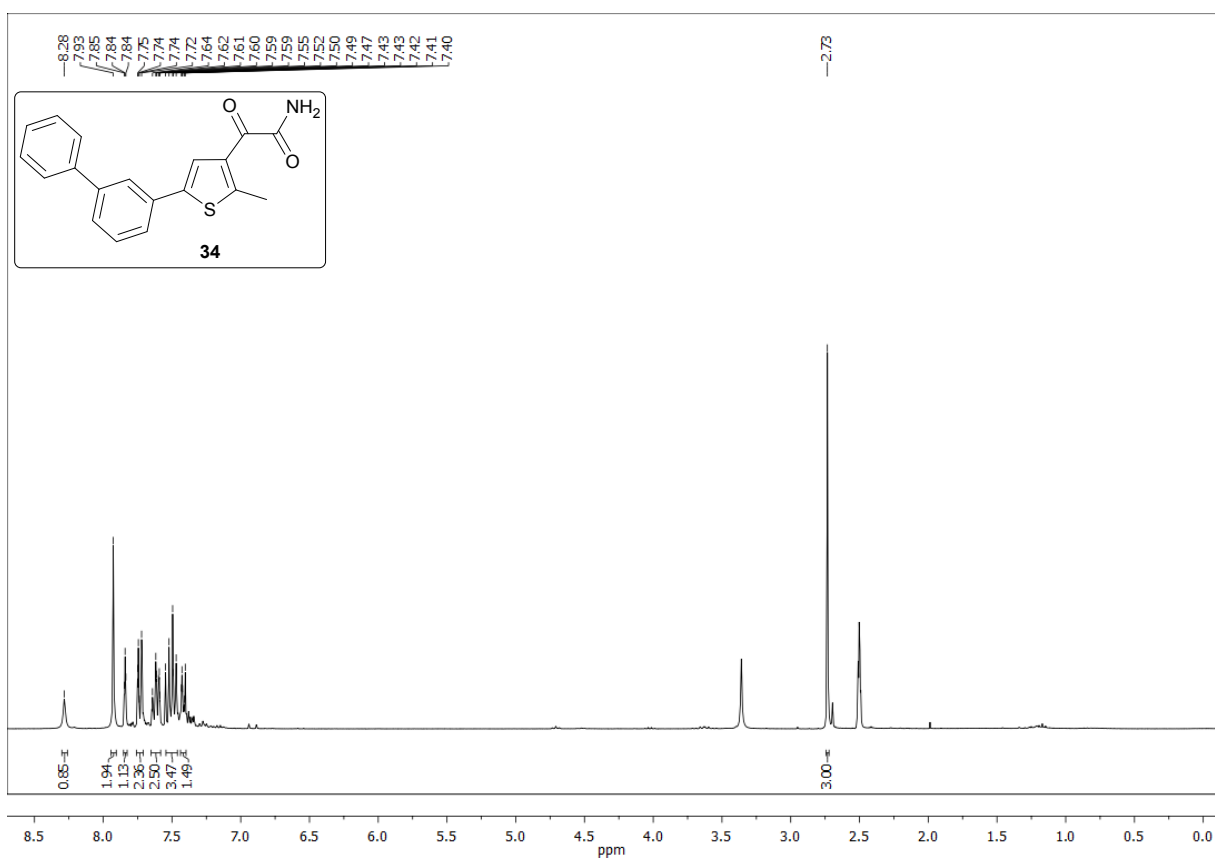

$^1\text{H-NMR}$  (75 MHz,  $\text{DMSO-}d_6$ ) for compound **34**:

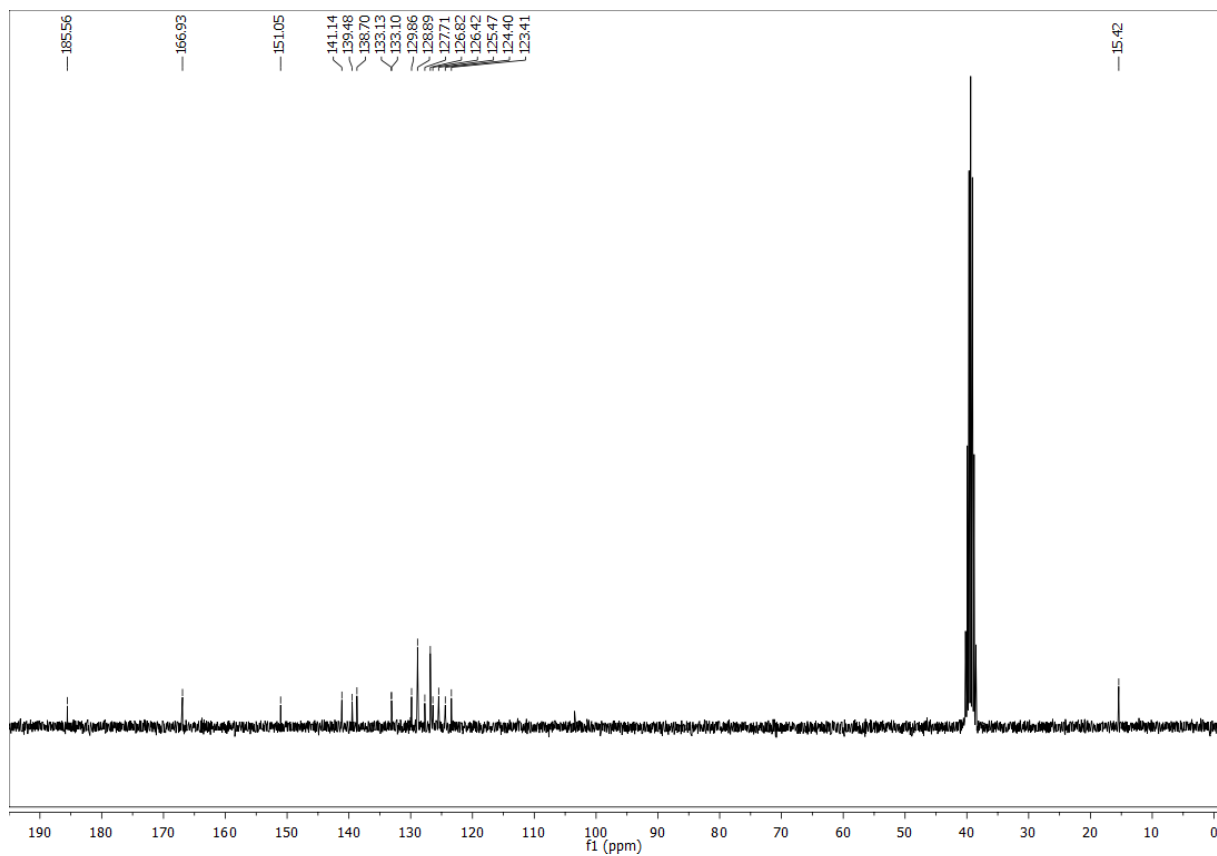

$^{13}\text{C}$ -NMR (300 MHz,  $\text{DMSO-}d_6$ ) for compound **35**:

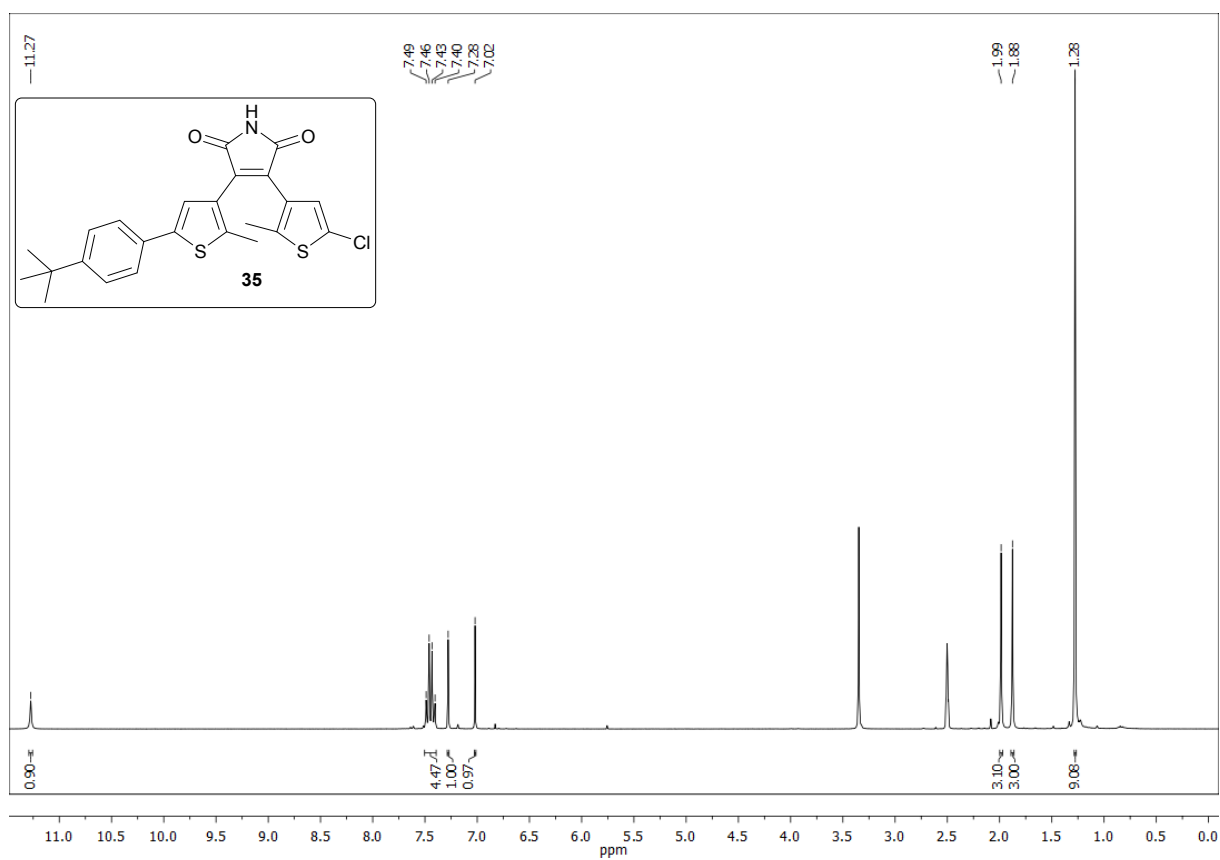

$^1\text{H}$ -NMR (75 MHz,  $\text{DMSO-}d_6$ ) for compound **35**:

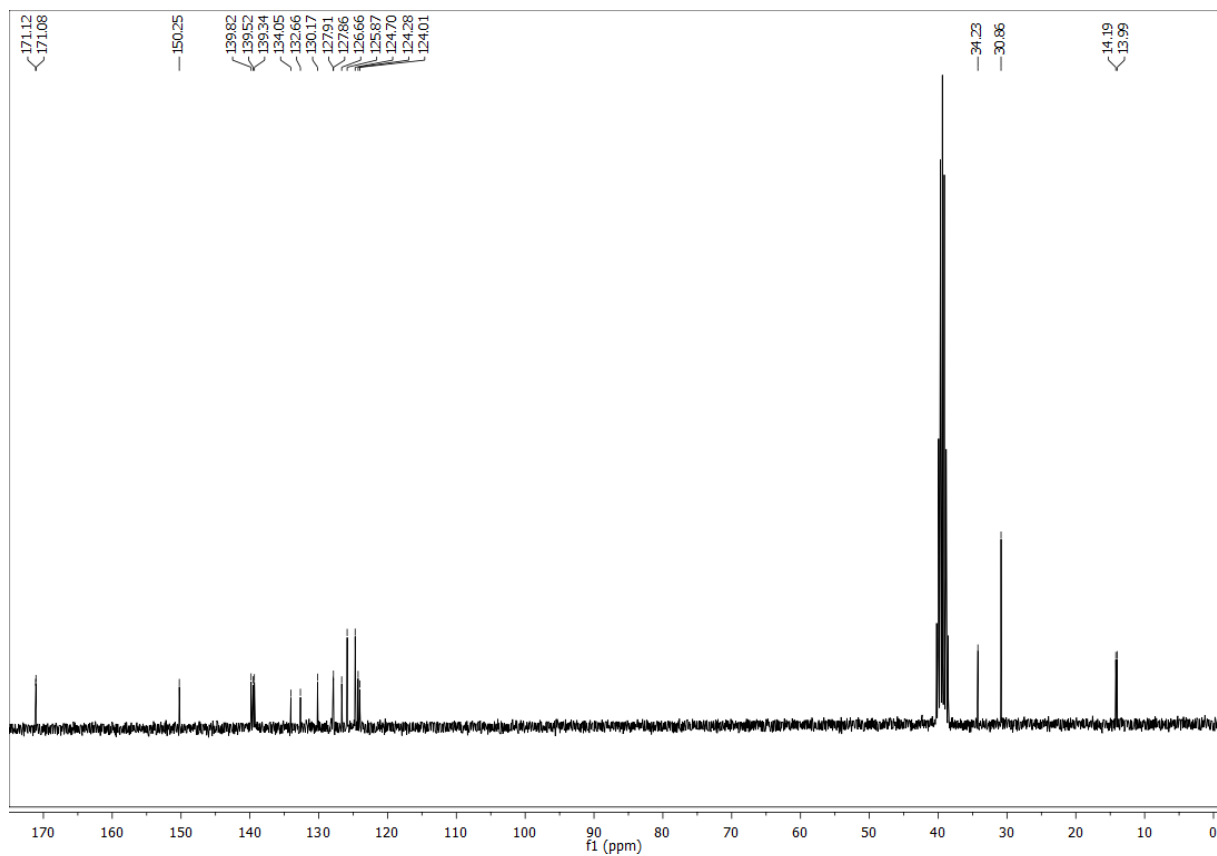

<sup>1</sup>H-NMR (300 MHz, DMSO-*d*<sub>6</sub>) for compound **36**:

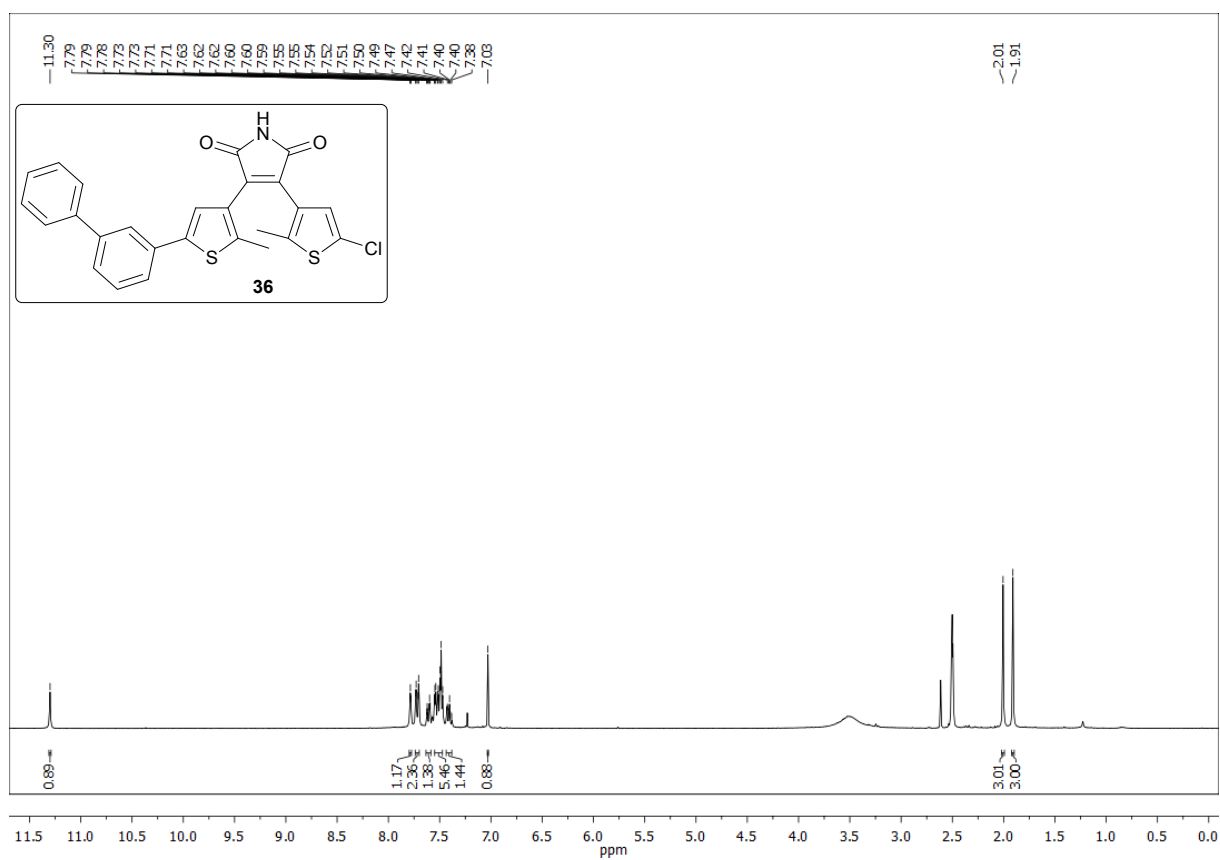

<sup>13</sup>C-NMR (75 MHz, DMSO-*d*<sub>6</sub>) for compound **36**:



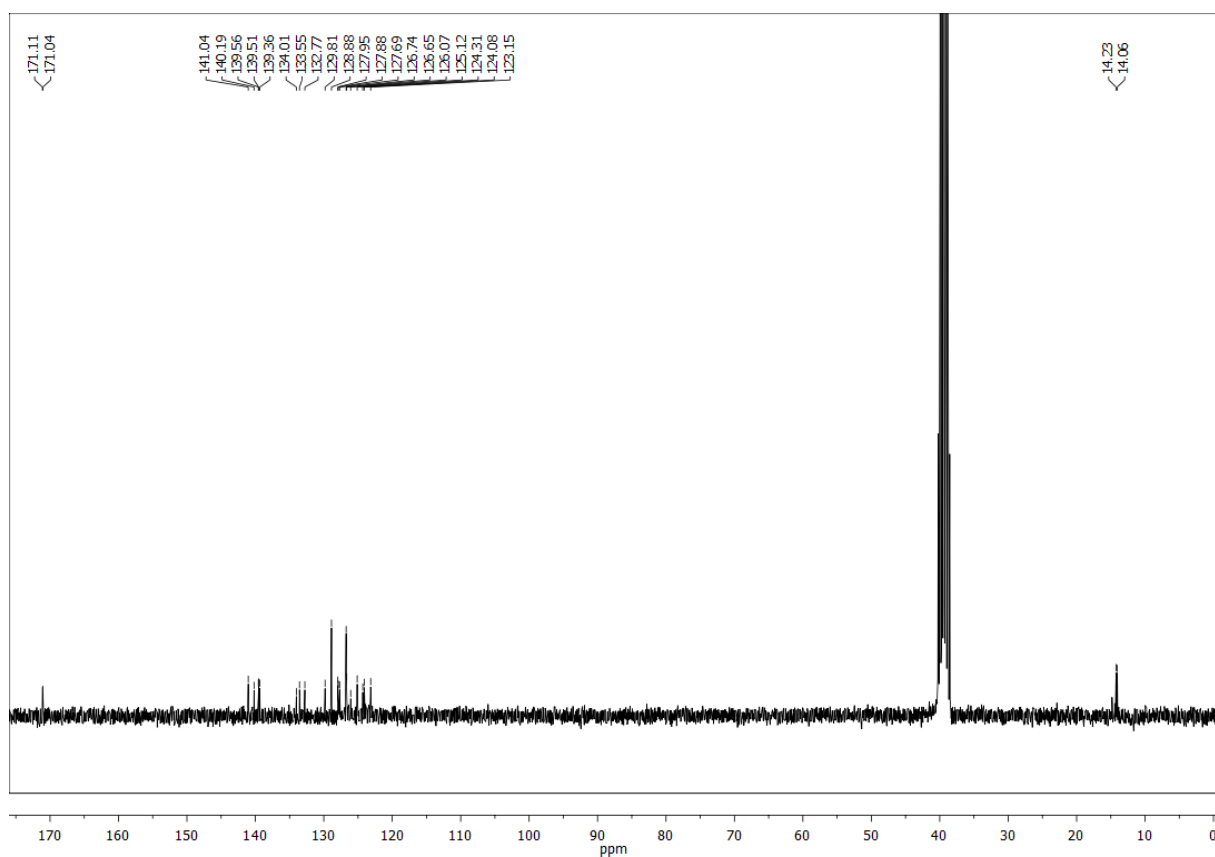

$^{13}\text{C-NMR}$  (300 MHz,  $\text{DMSO-}d_6$ ) for compound **37**:

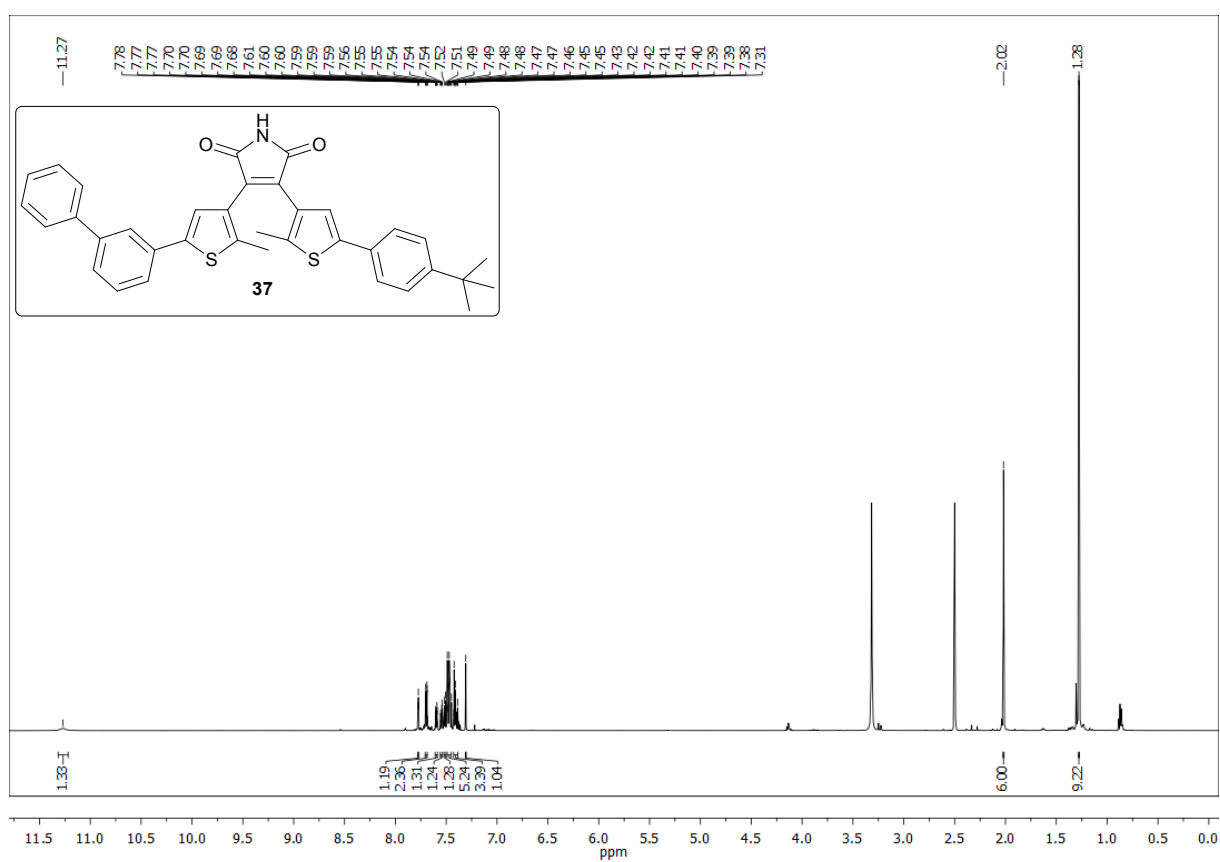

$^1\text{H-NMR}$  (300 MHz,  $\text{DMSO-}d_6$ ) for compound **37**:

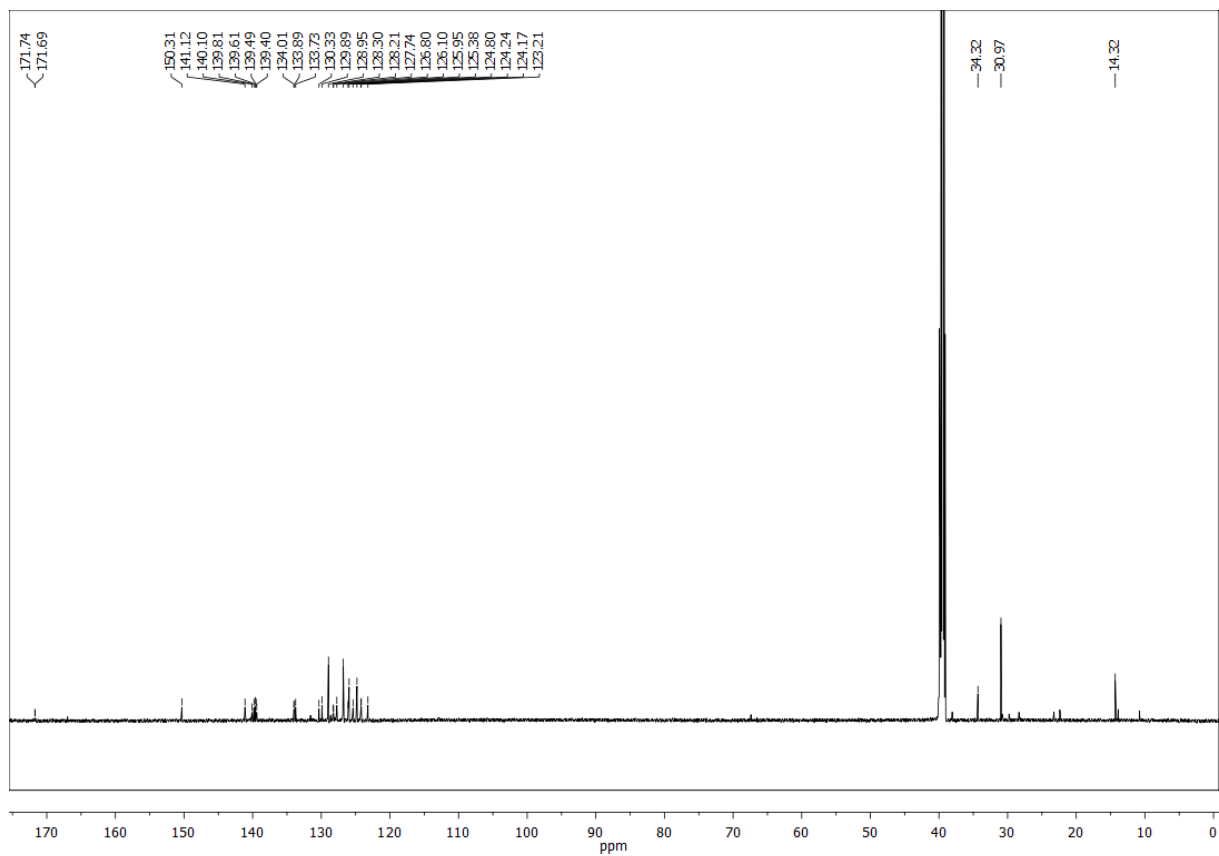

Supplement: c5ra00015g1.pdf [file c5ra00015g1.pdf]
